# Supplementary material for: Synthesis of polysubstituted 1,2-dihydroquinolines and indoles via cascade reactions of arylamines and propargylic alcohols catalyzed by FeCl3·6H2O
Source: Royal Society of Chemistry journal article supplement (doi:10.1039/c5ob02658j), 2016-01-01

# **Electronic Supplementary Information**

*For*

## **Synthesis of Polysubstituted 1,2-Dihydroquinolines and Indoles *via* Cascade**

### **Reactions of Arylamines and Propargylic Alcohols Catalyzed by FeCl<sub>3</sub>·6H<sub>2</sub>O**

Min Shao,<sup>a</sup> Yunjun Wu,<sup>a</sup> Zhijun Feng,<sup>a</sup> Xiaoxia Gu<sup>a</sup> and Shaoyin Wang<sup>\*a,b</sup>

<sup>a</sup>Department of Chemistry, Wannan Medical College, Wuhu, Anhui 241002, China.

<sup>b</sup>Key Laboratory of Functional Molecular Solids, Ministry of Education, Anhui Laboratory of Molecule-Based Materials, Institute of Organic Chemistry, School of Chemistry and Materials Science, Anhui Normal University, Wuhu, Anhui 241000, China.

E-mail: wsychem@163.com

## **Table of Contents**

|                                                                 |               |
|-----------------------------------------------------------------|---------------|
| <b>Copies of <sup>1</sup>H NMR and <sup>13</sup>C NMR .....</b> | <b>S2-S25</b> |
|-----------------------------------------------------------------|---------------|

# Copies of $^1\text{H}$ NMR and $^{13}\text{C}$ NMR

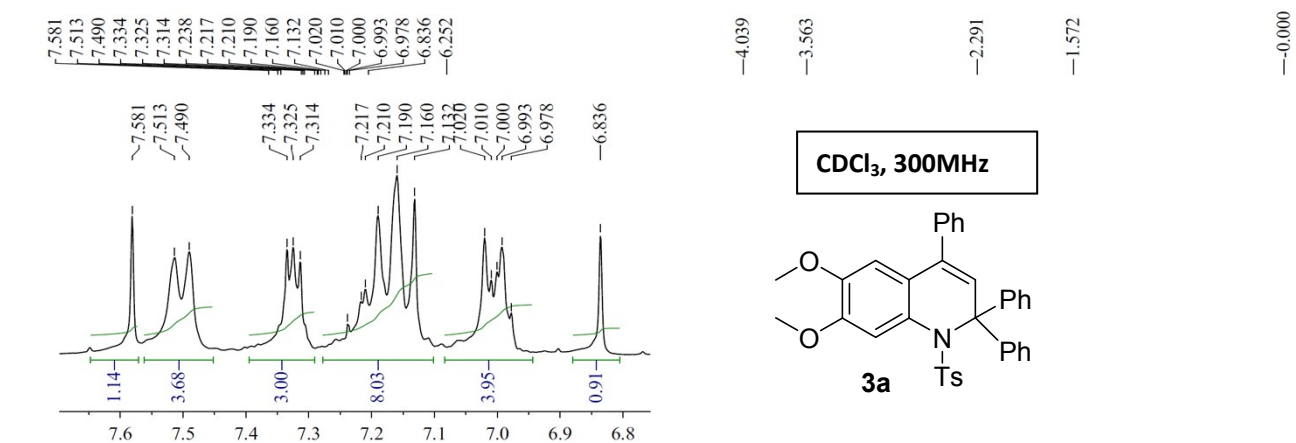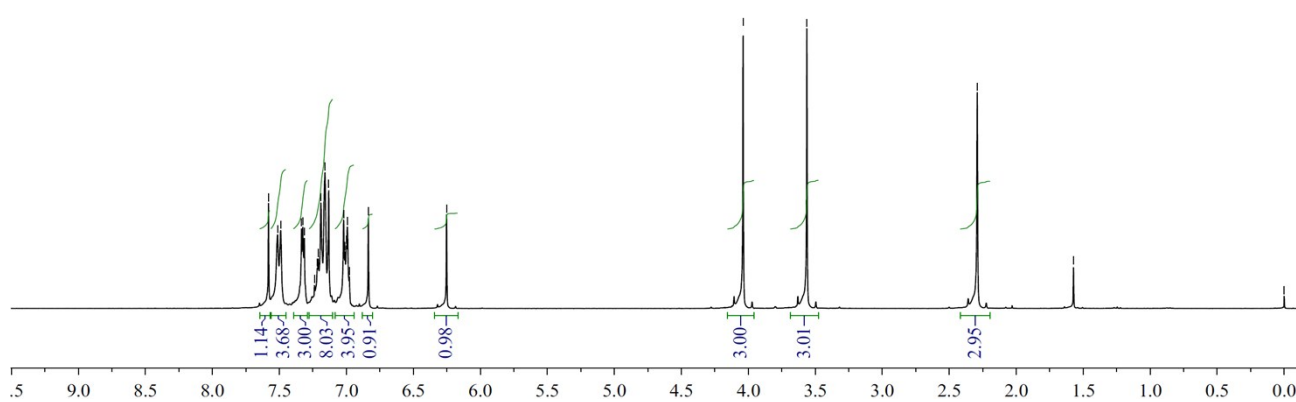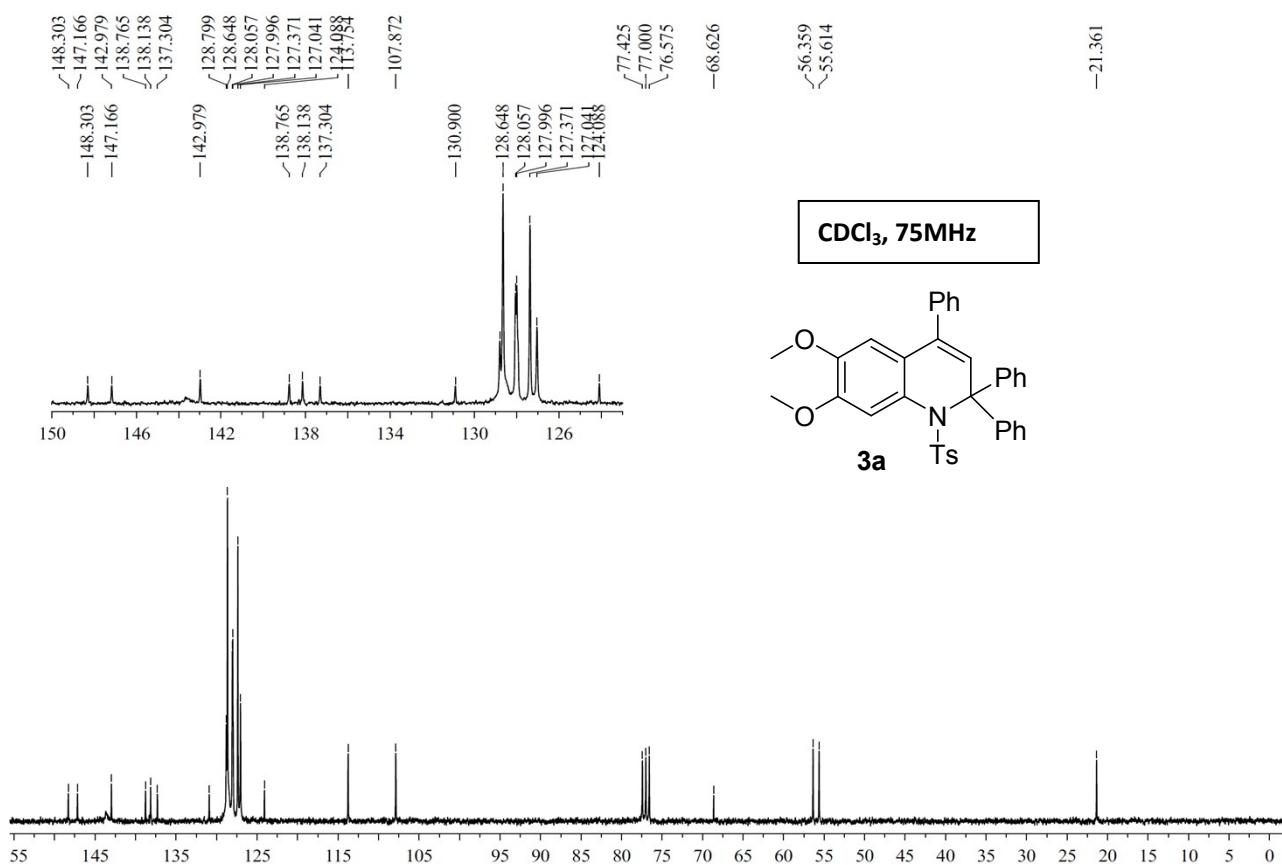

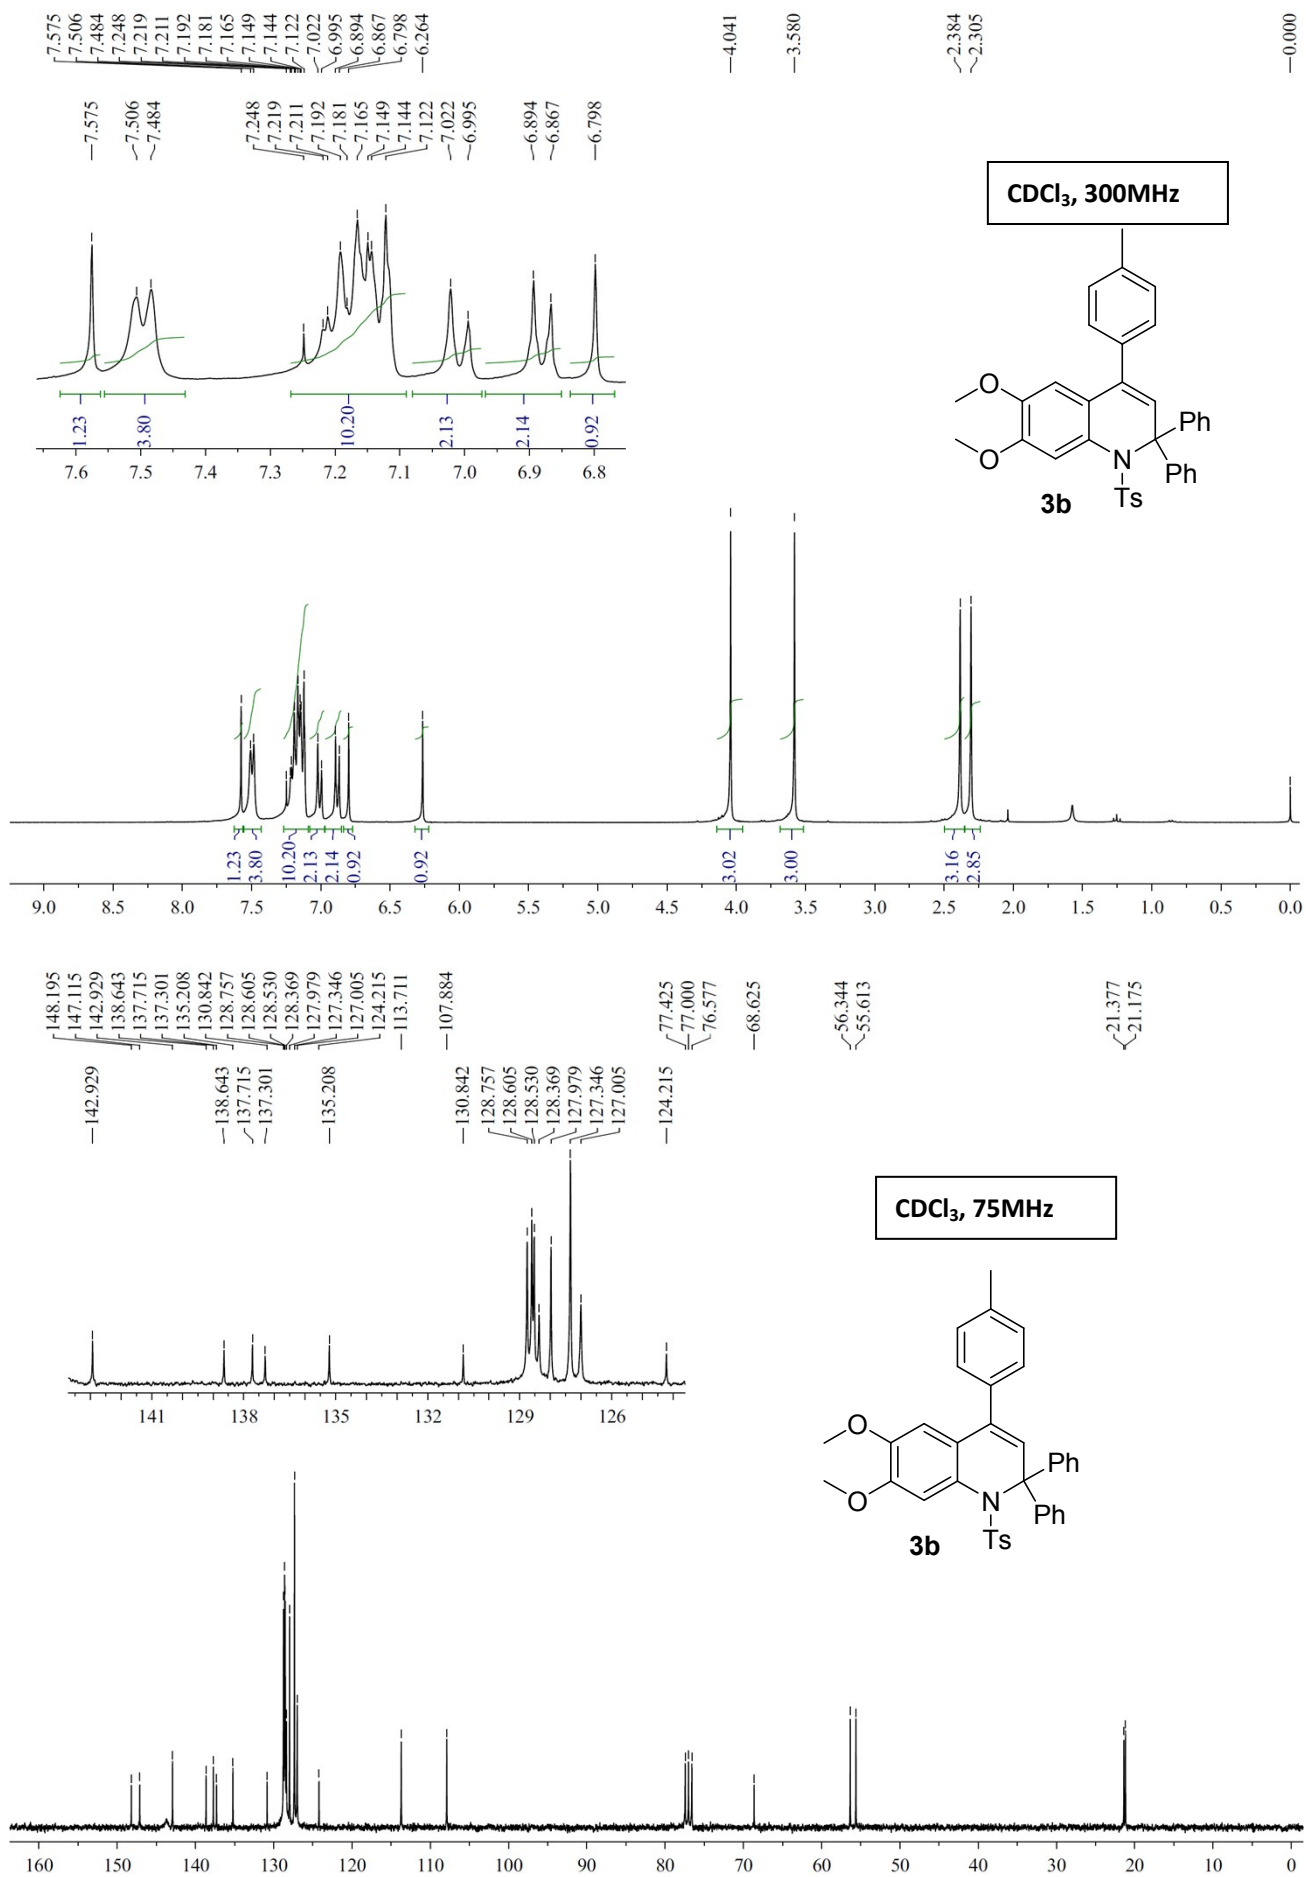

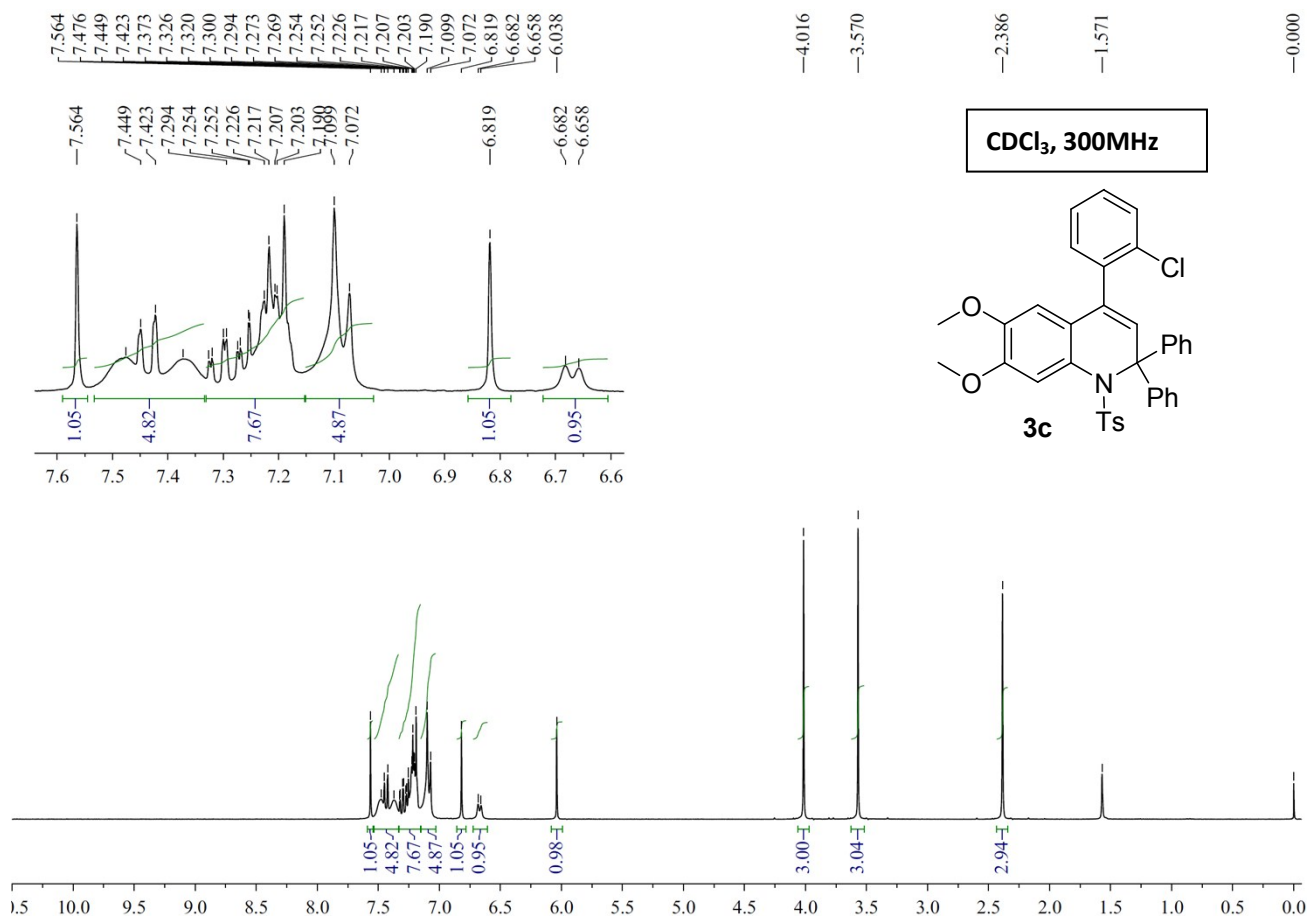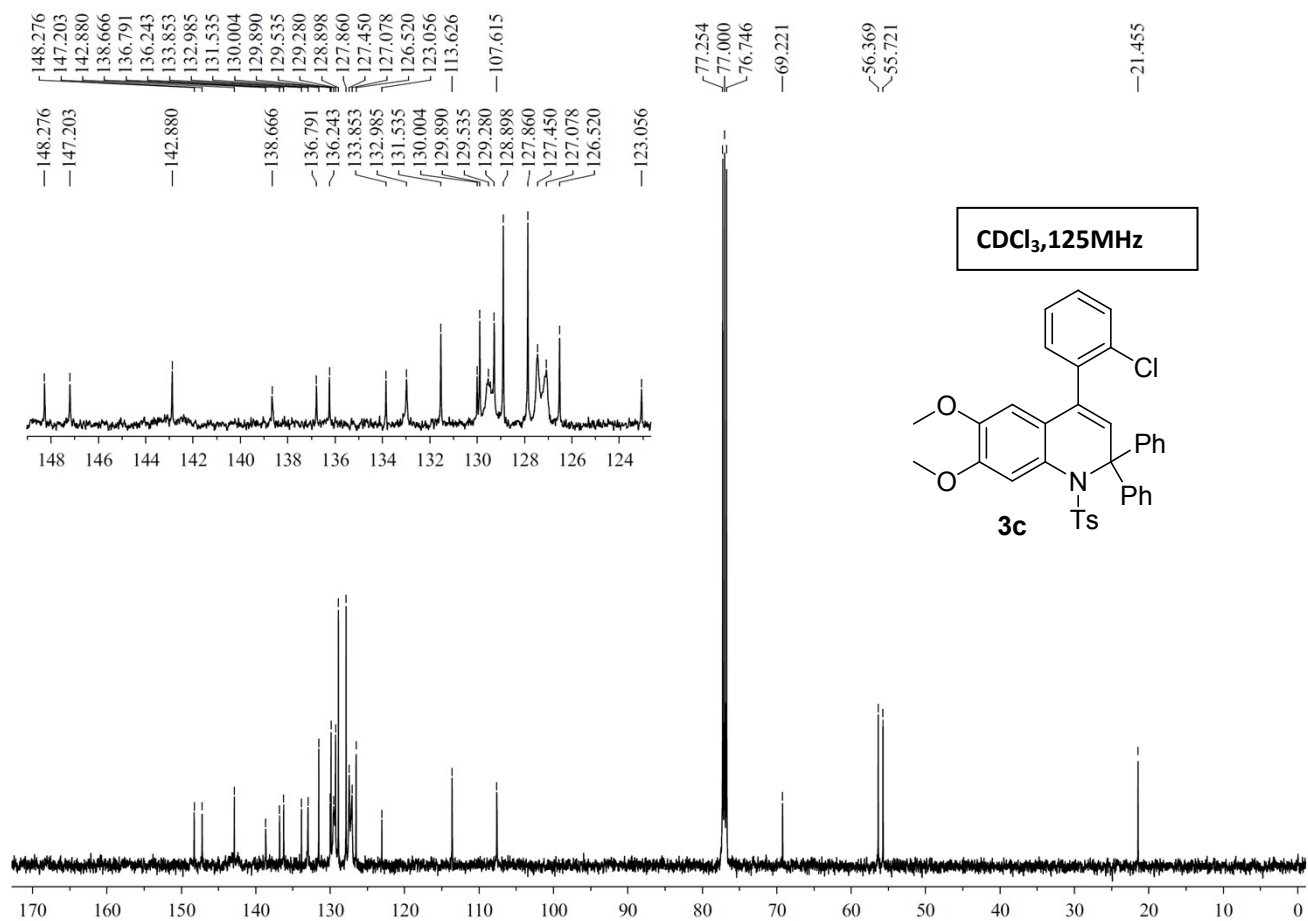

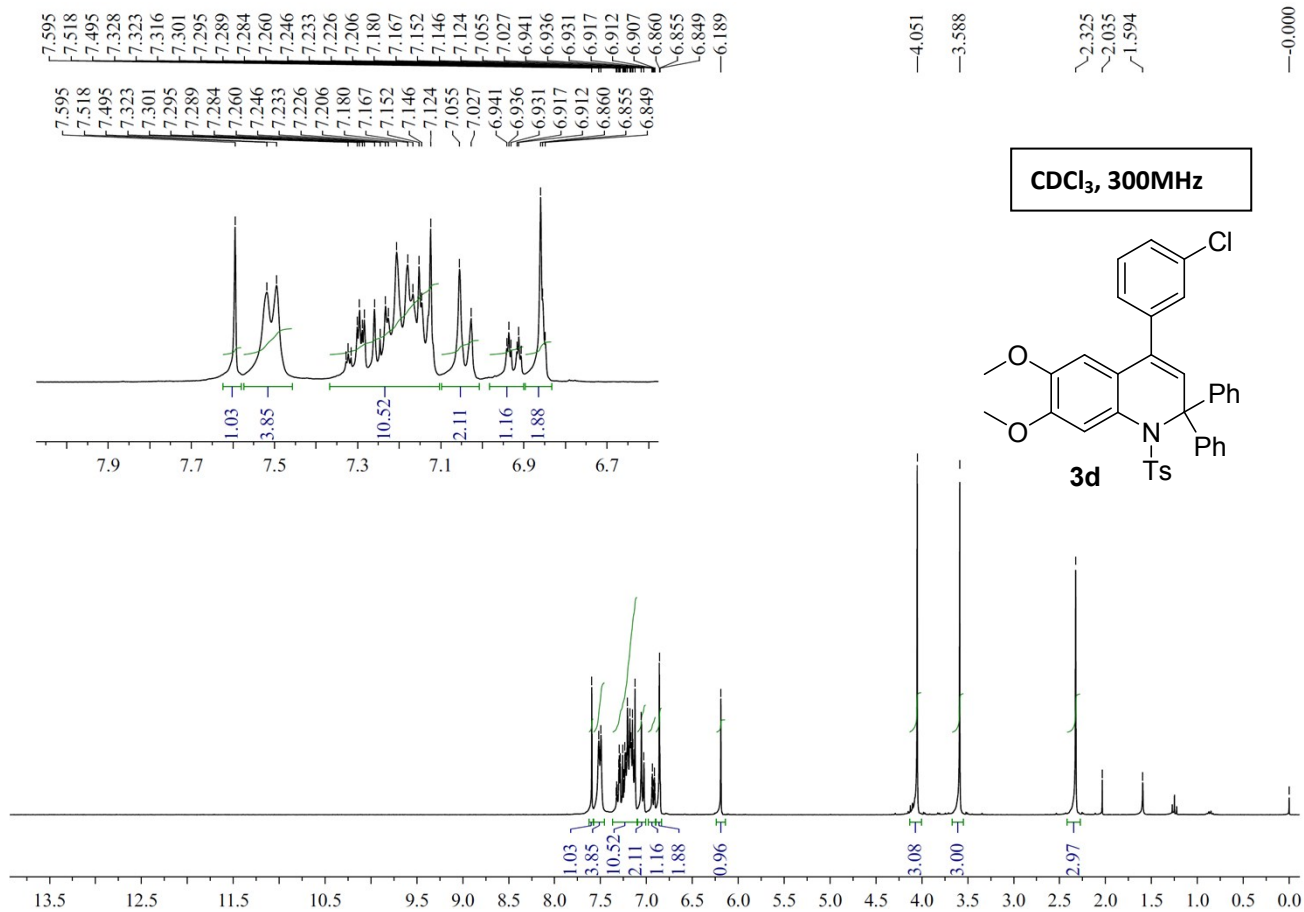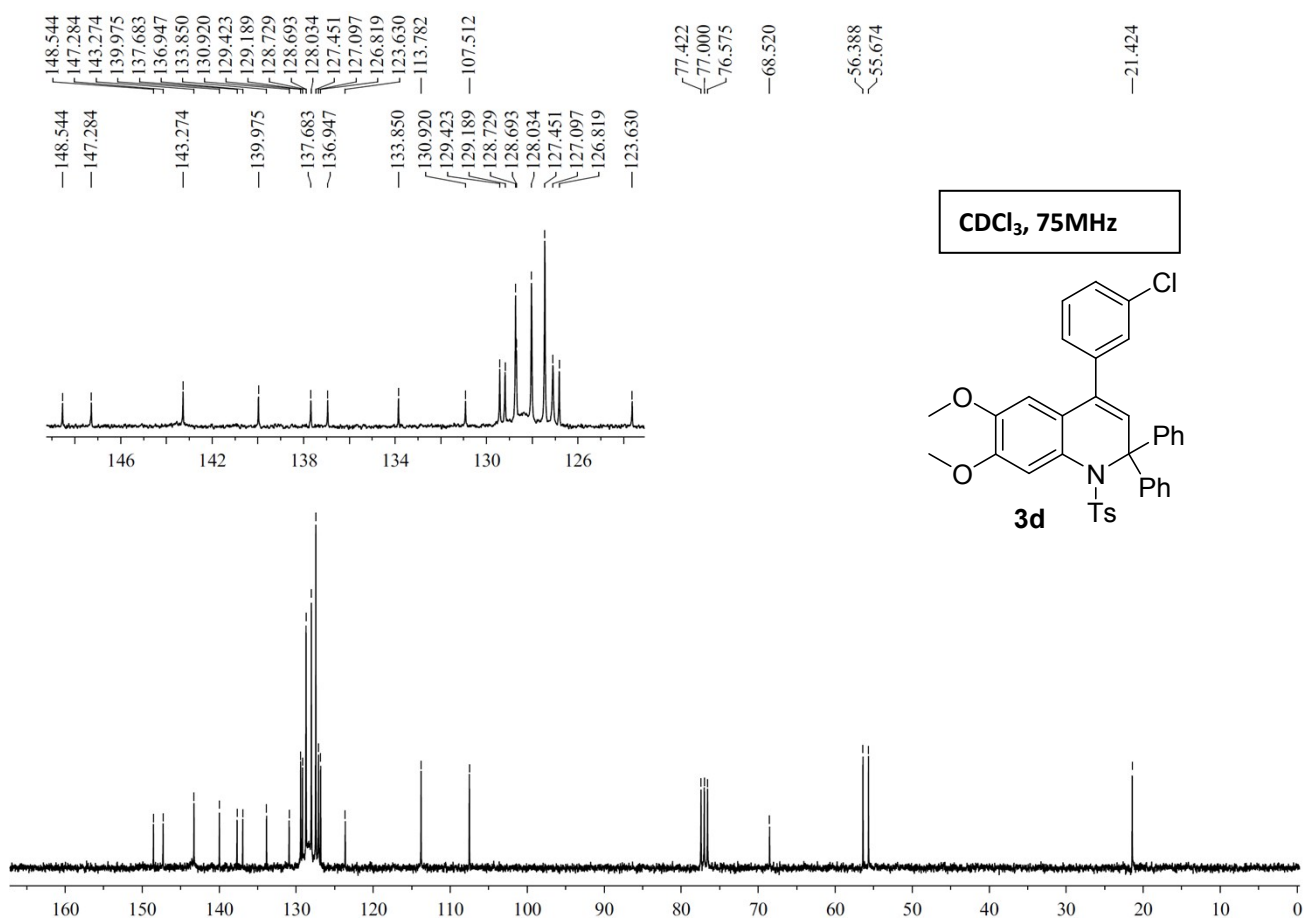

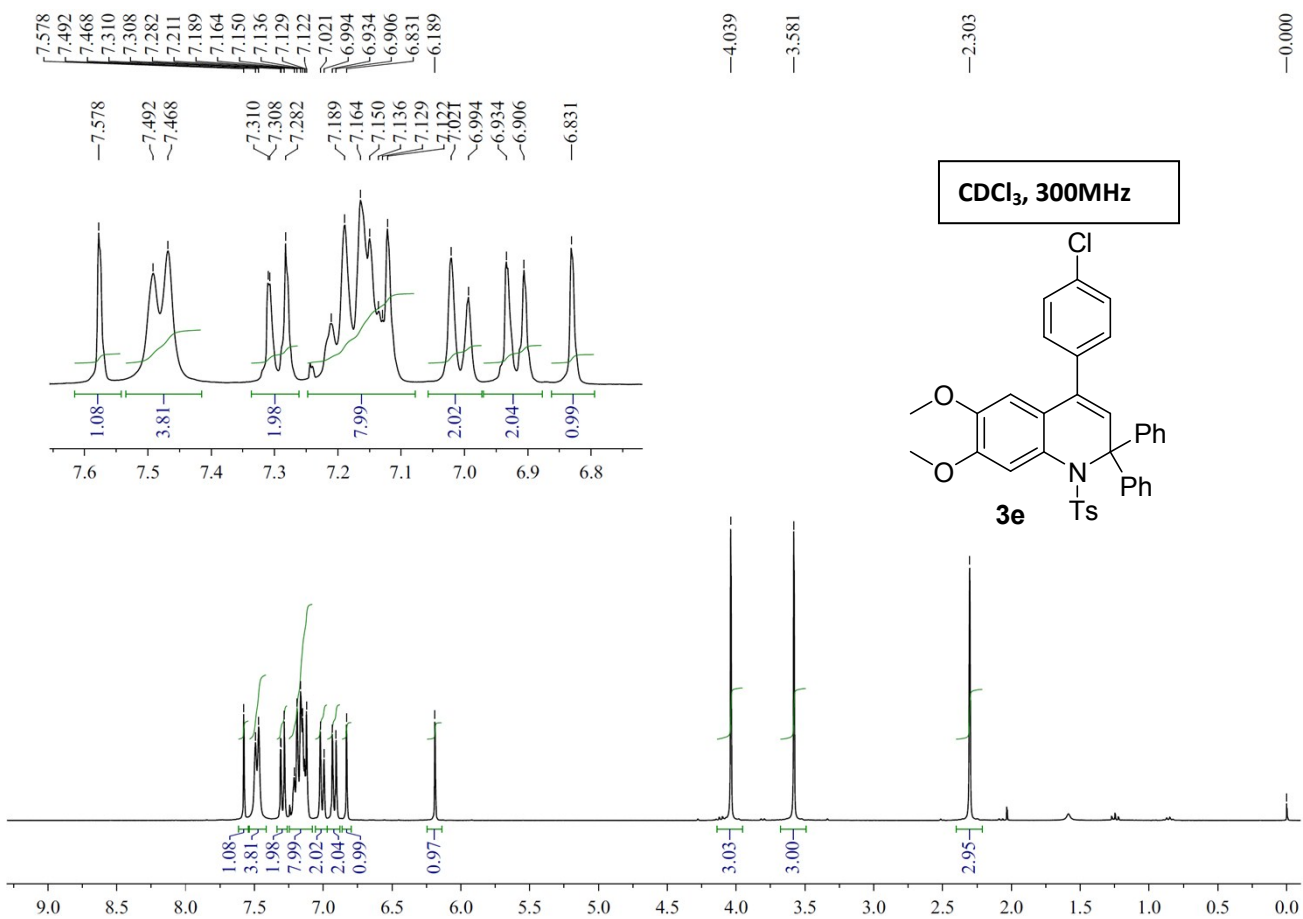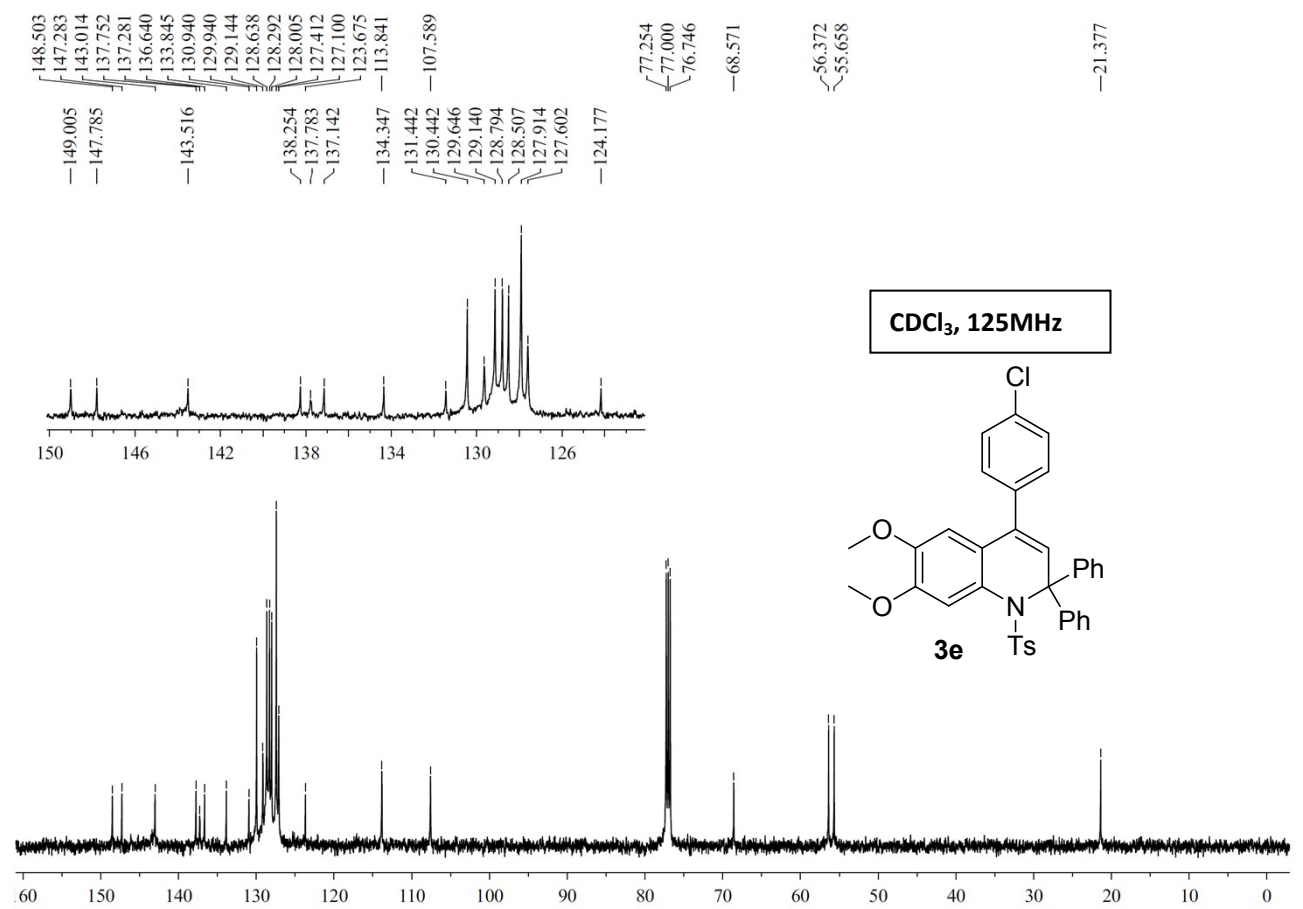

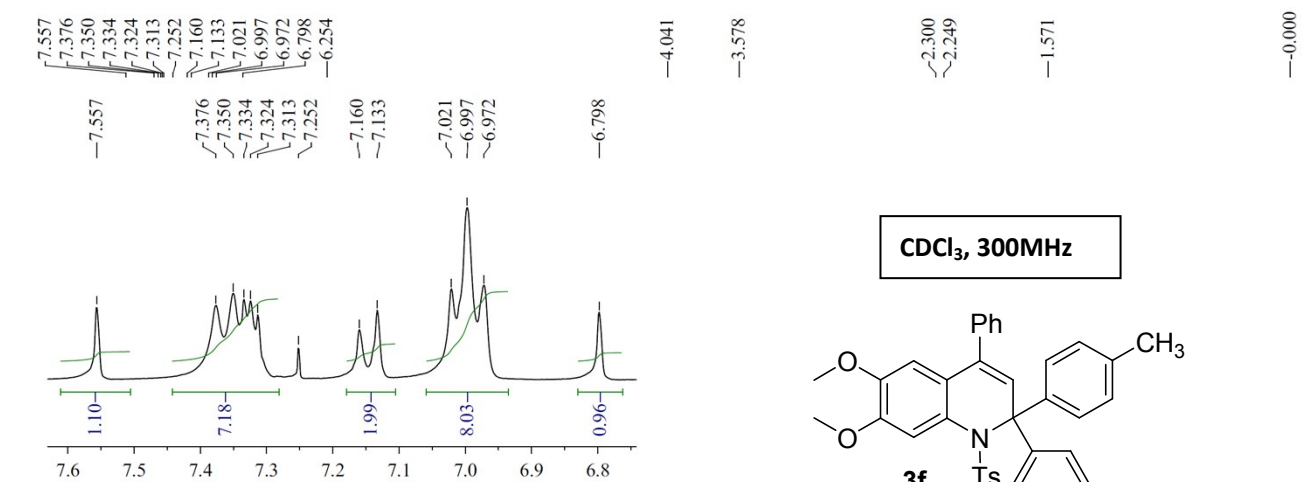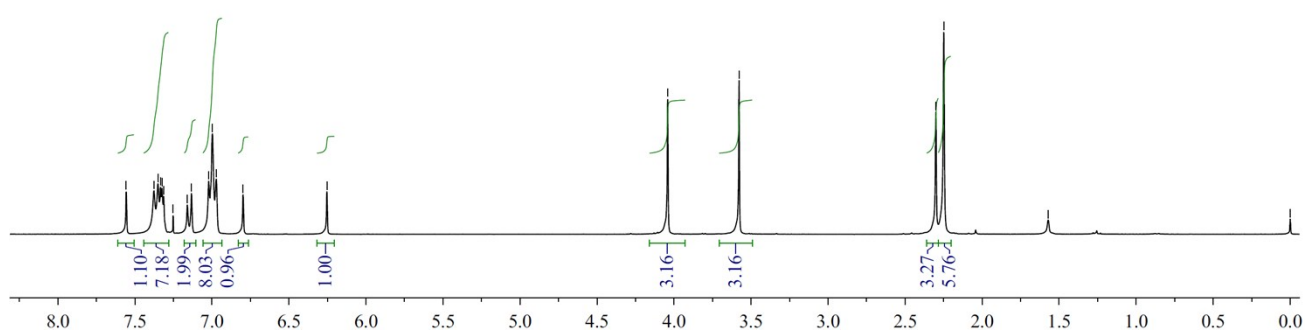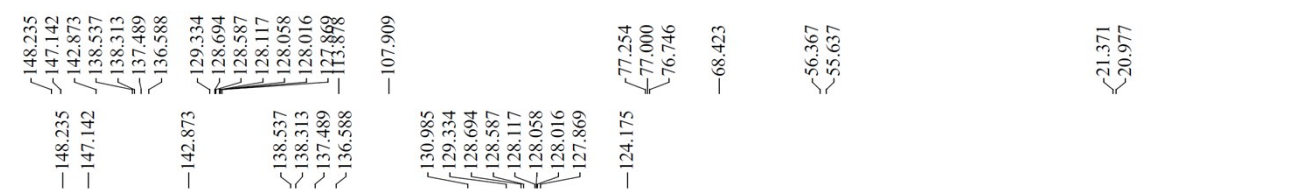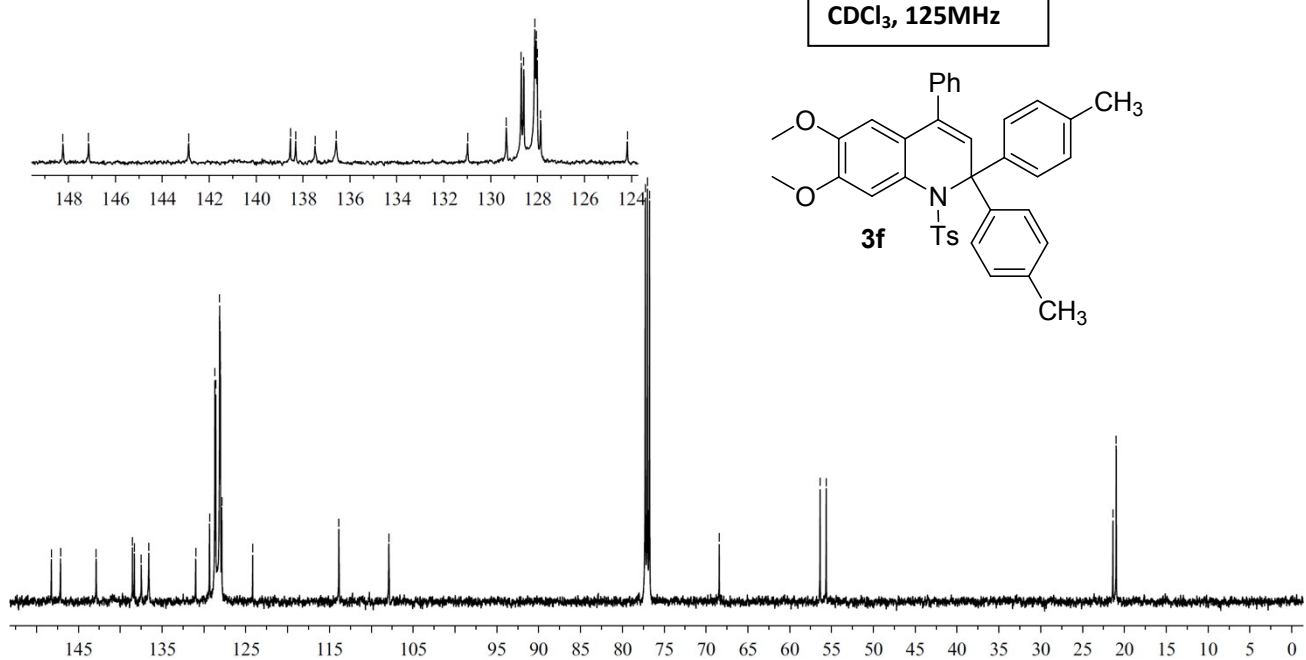



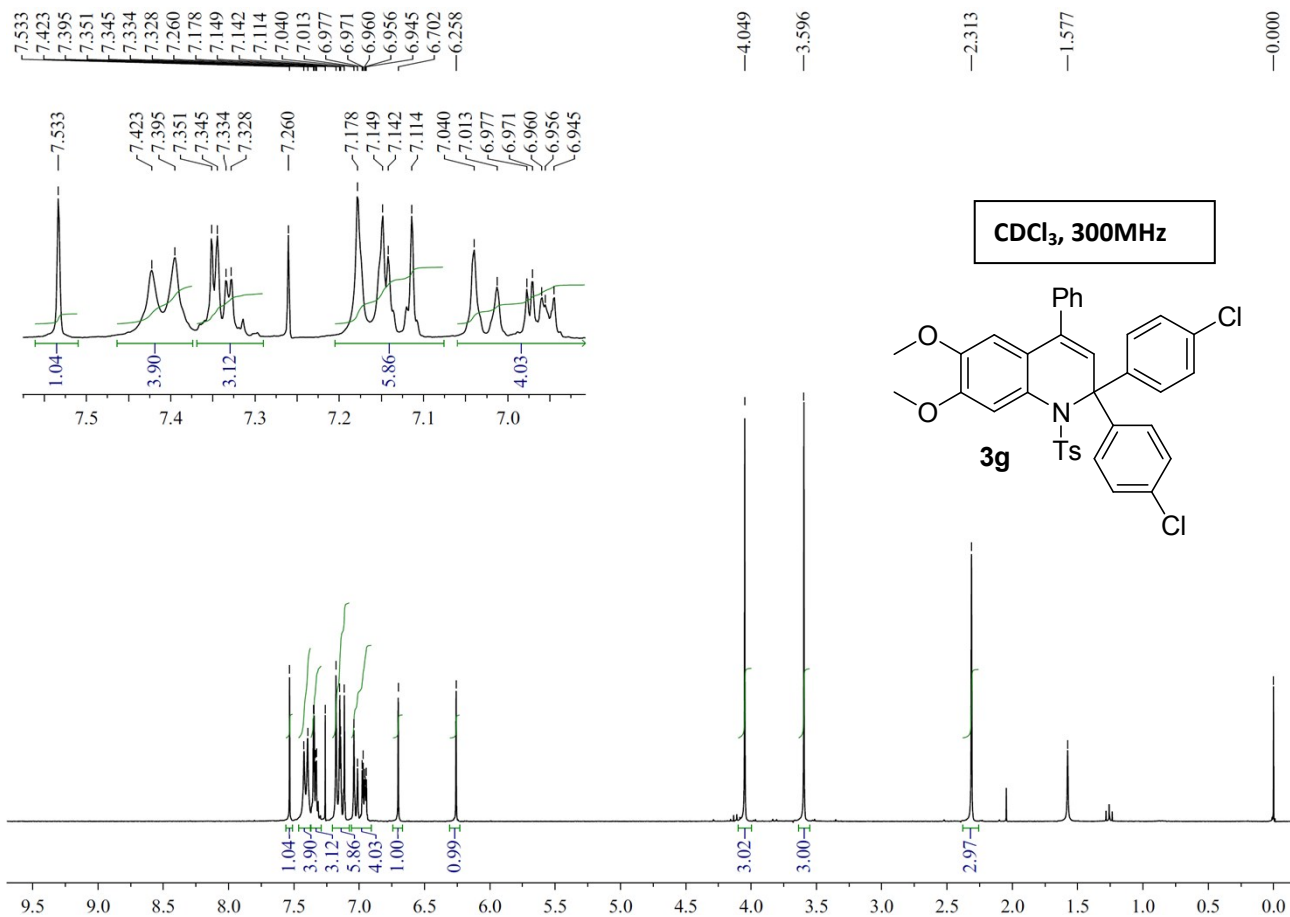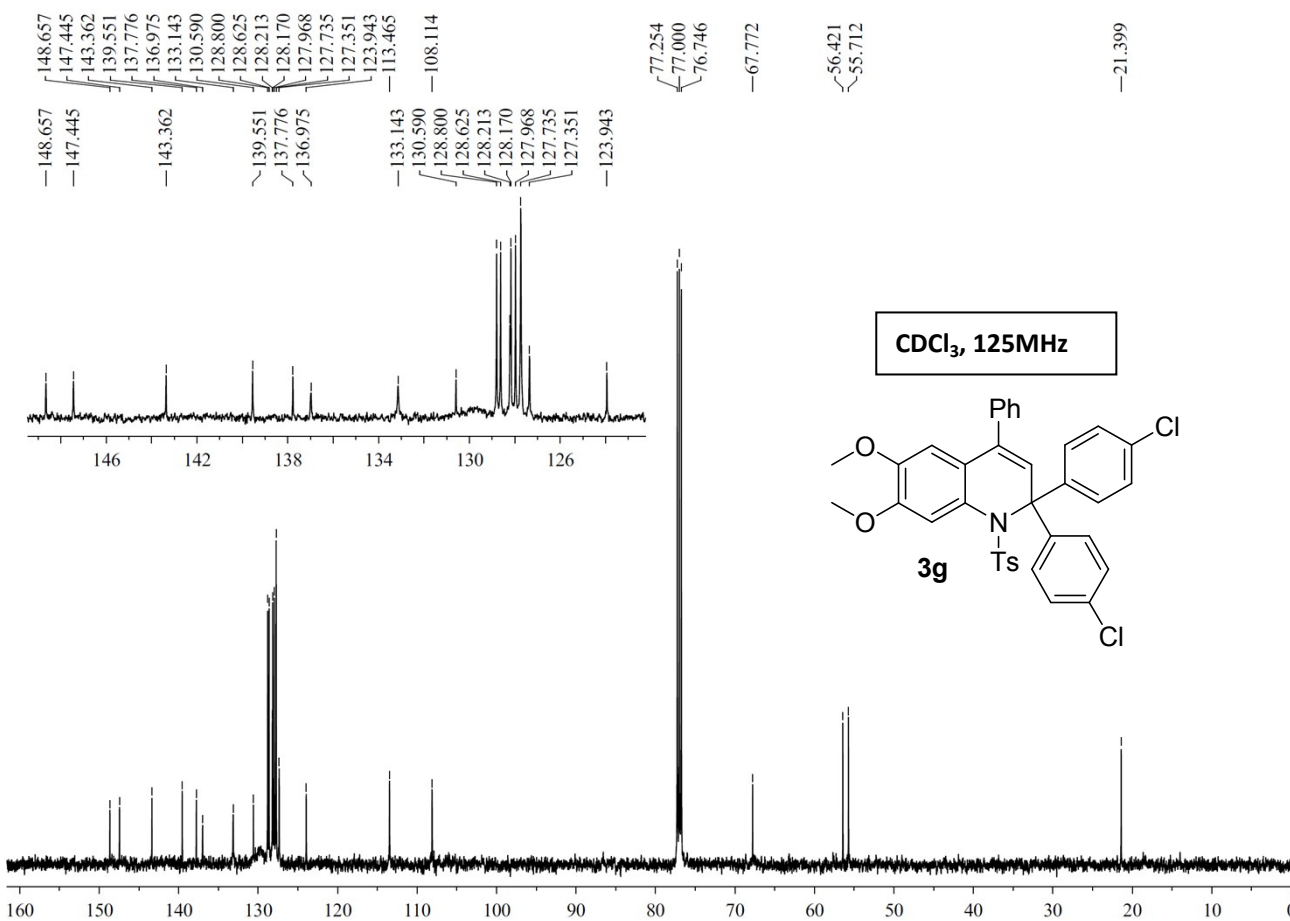



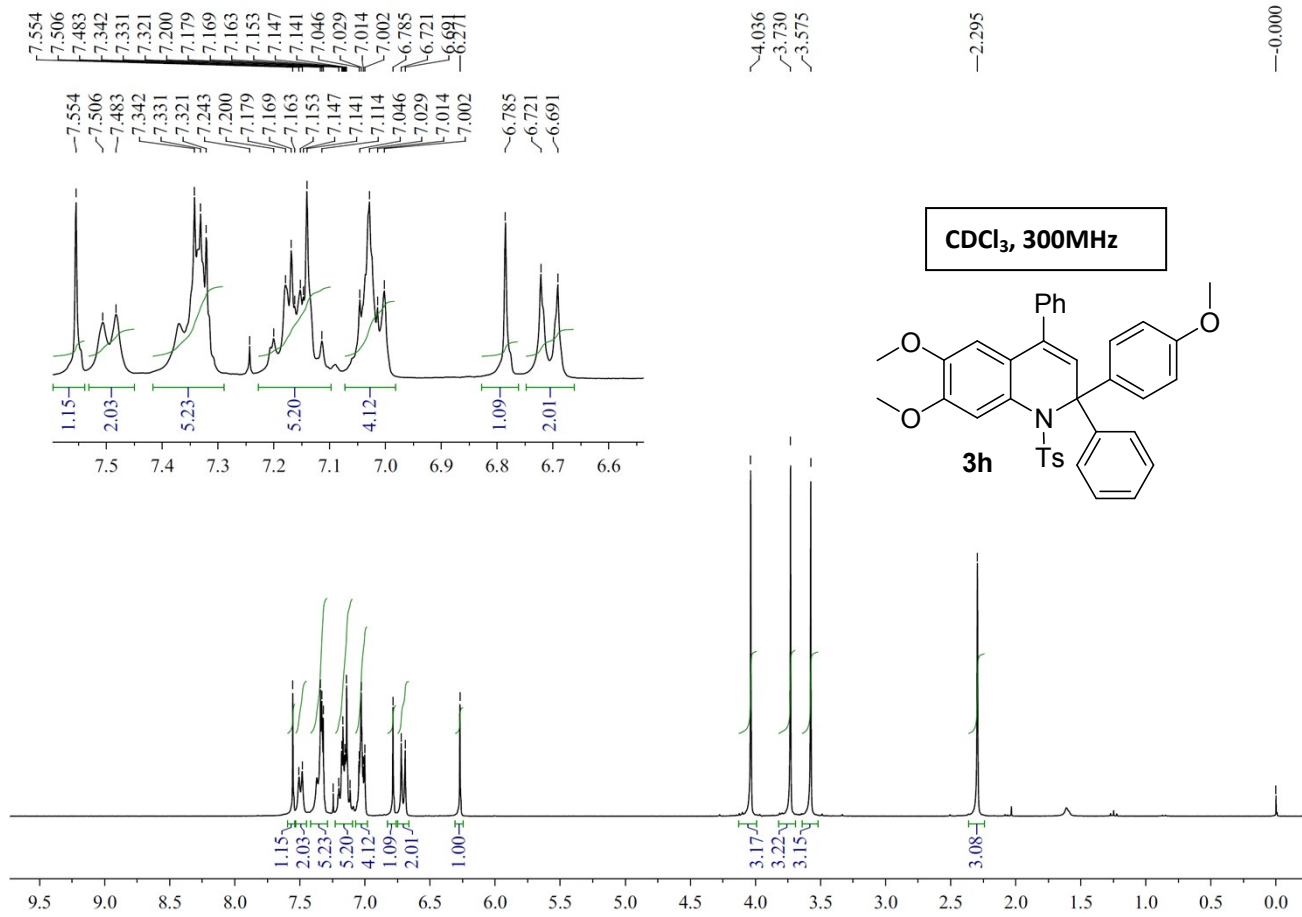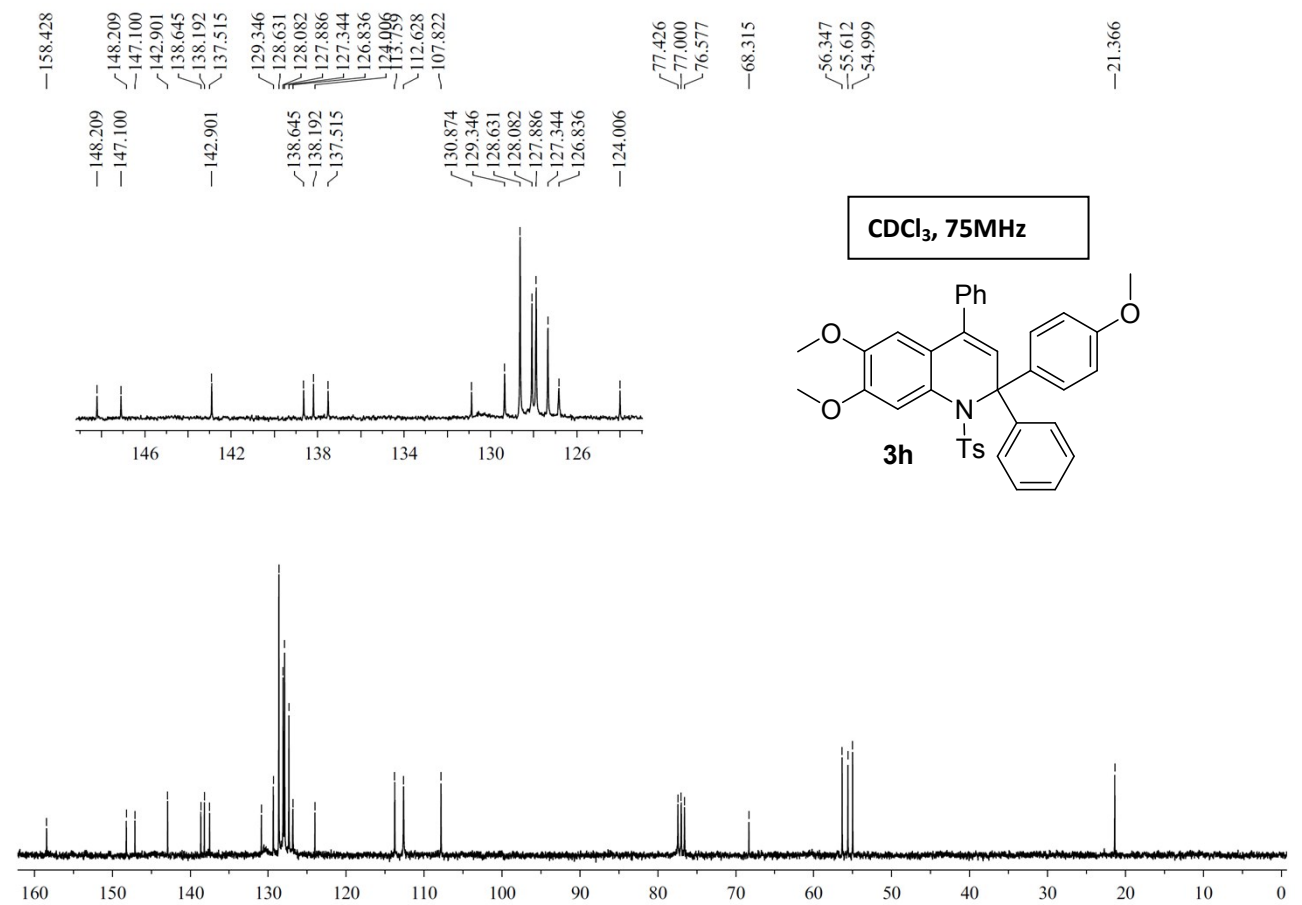

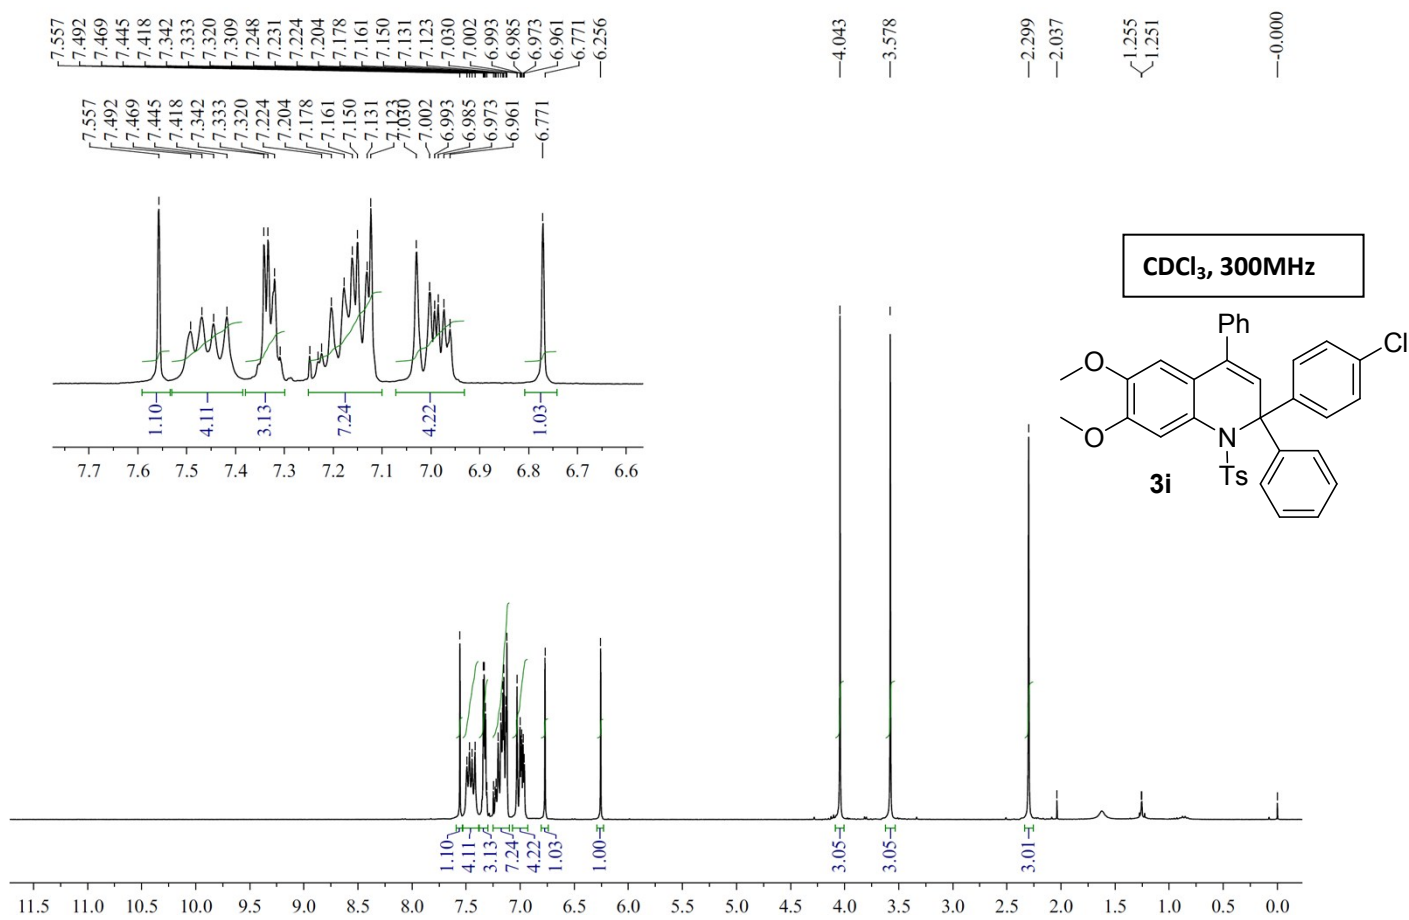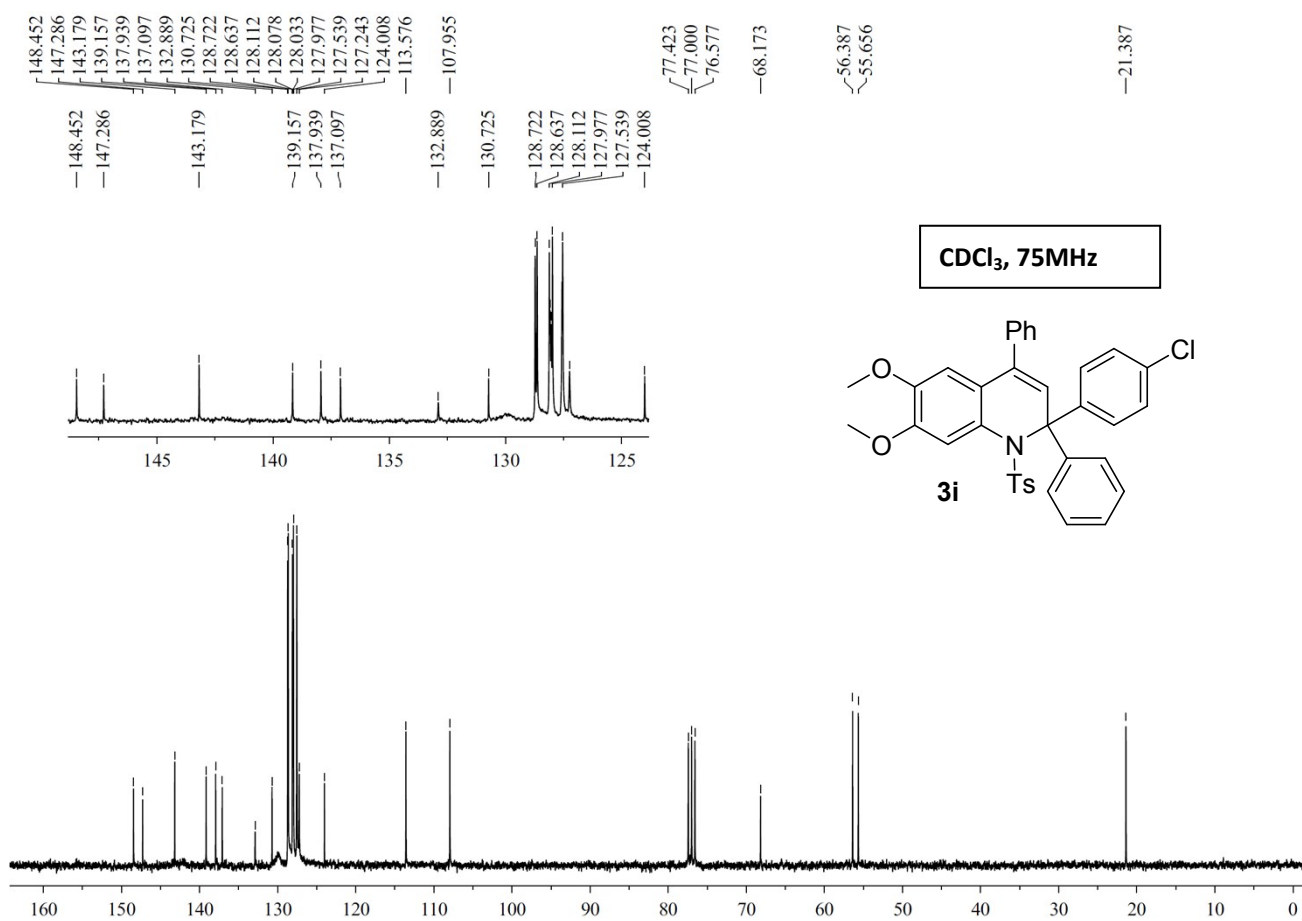

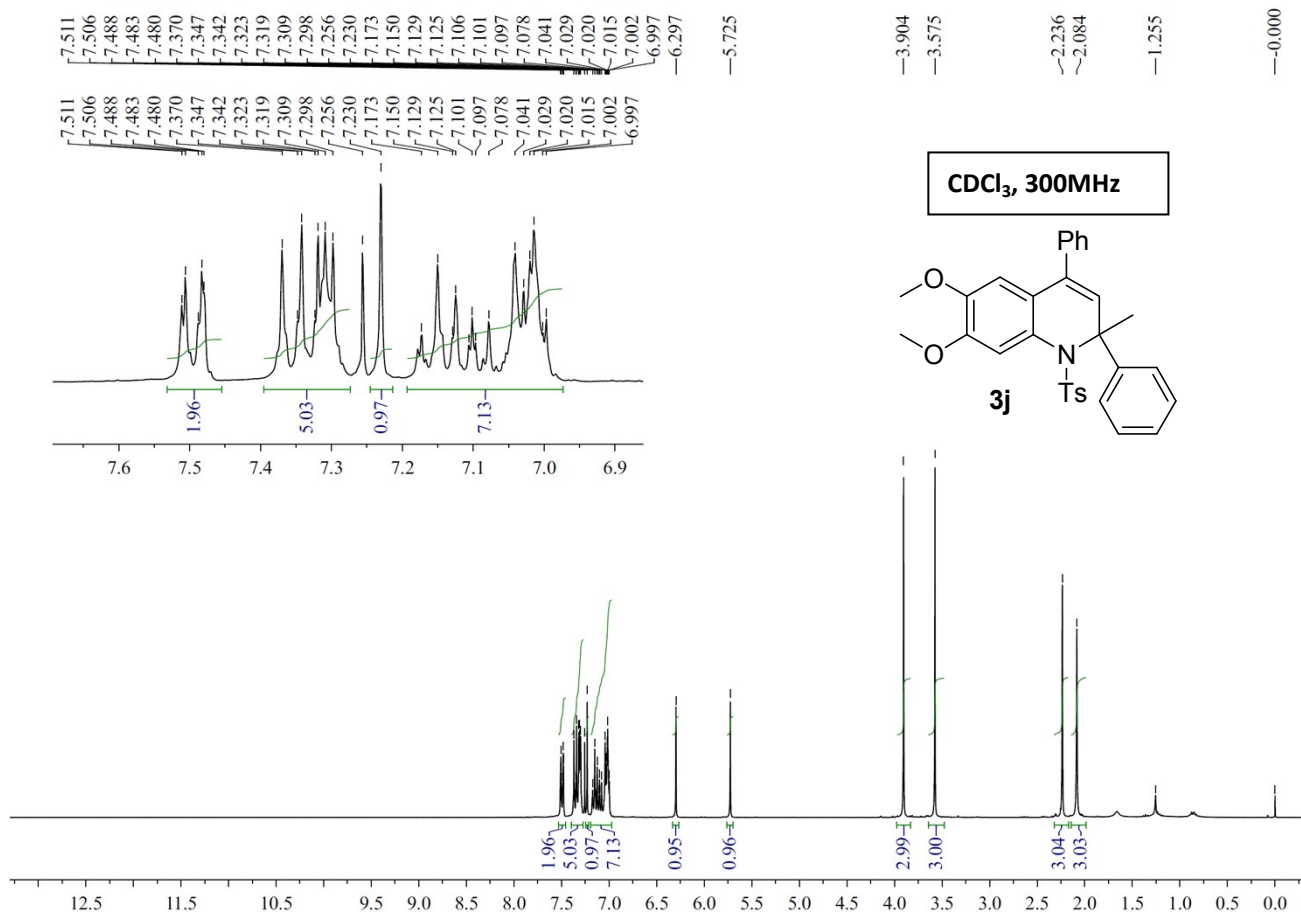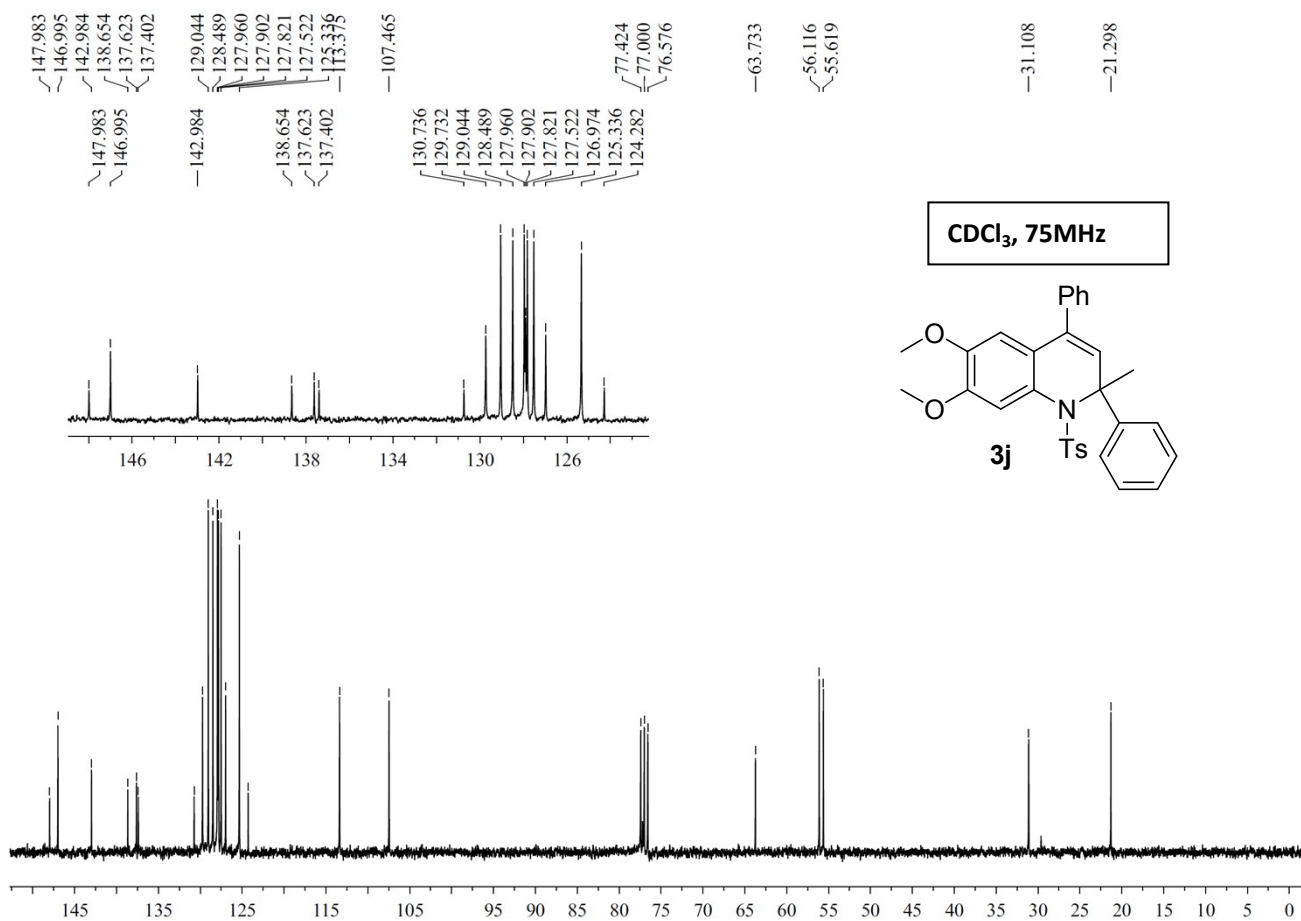

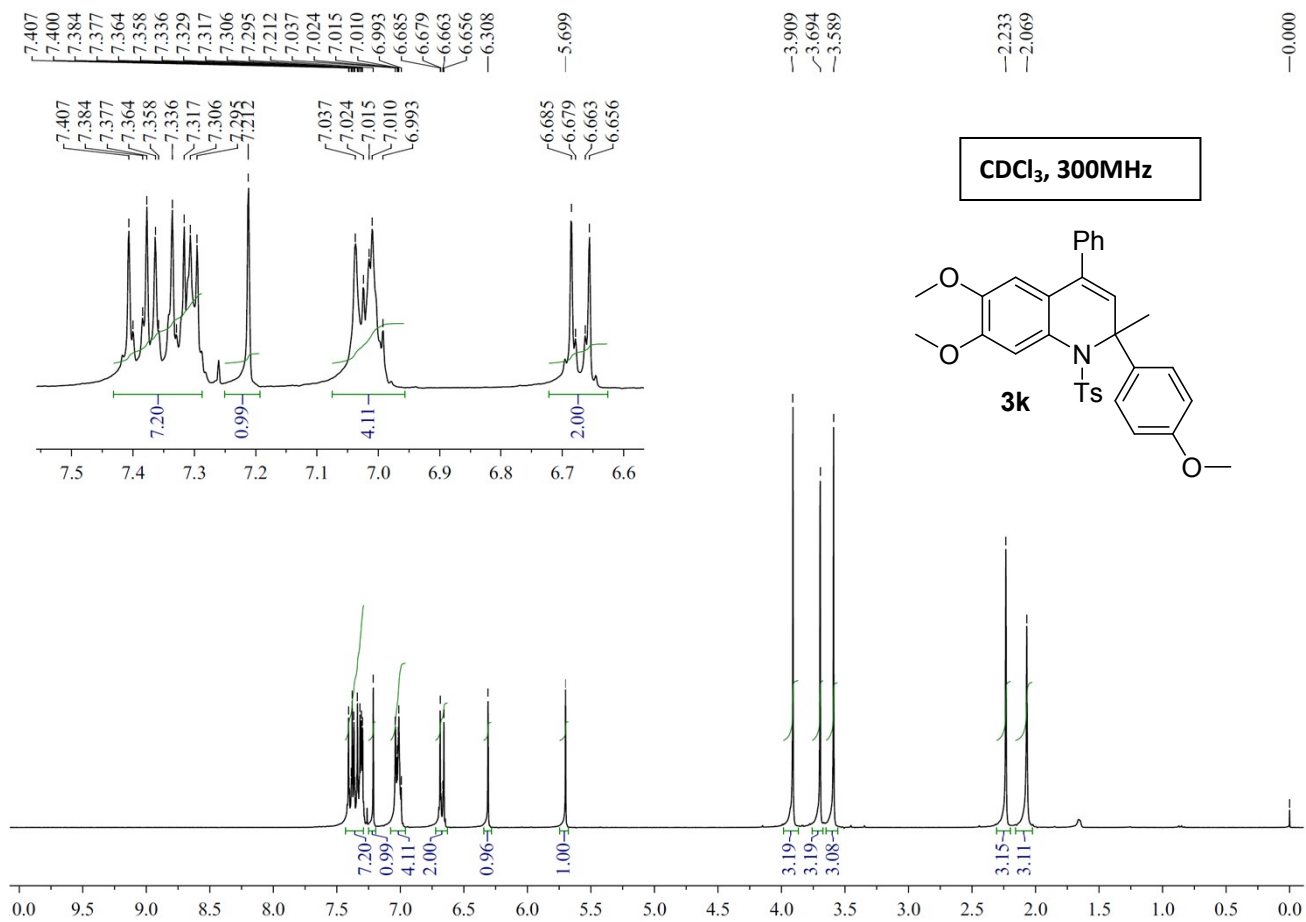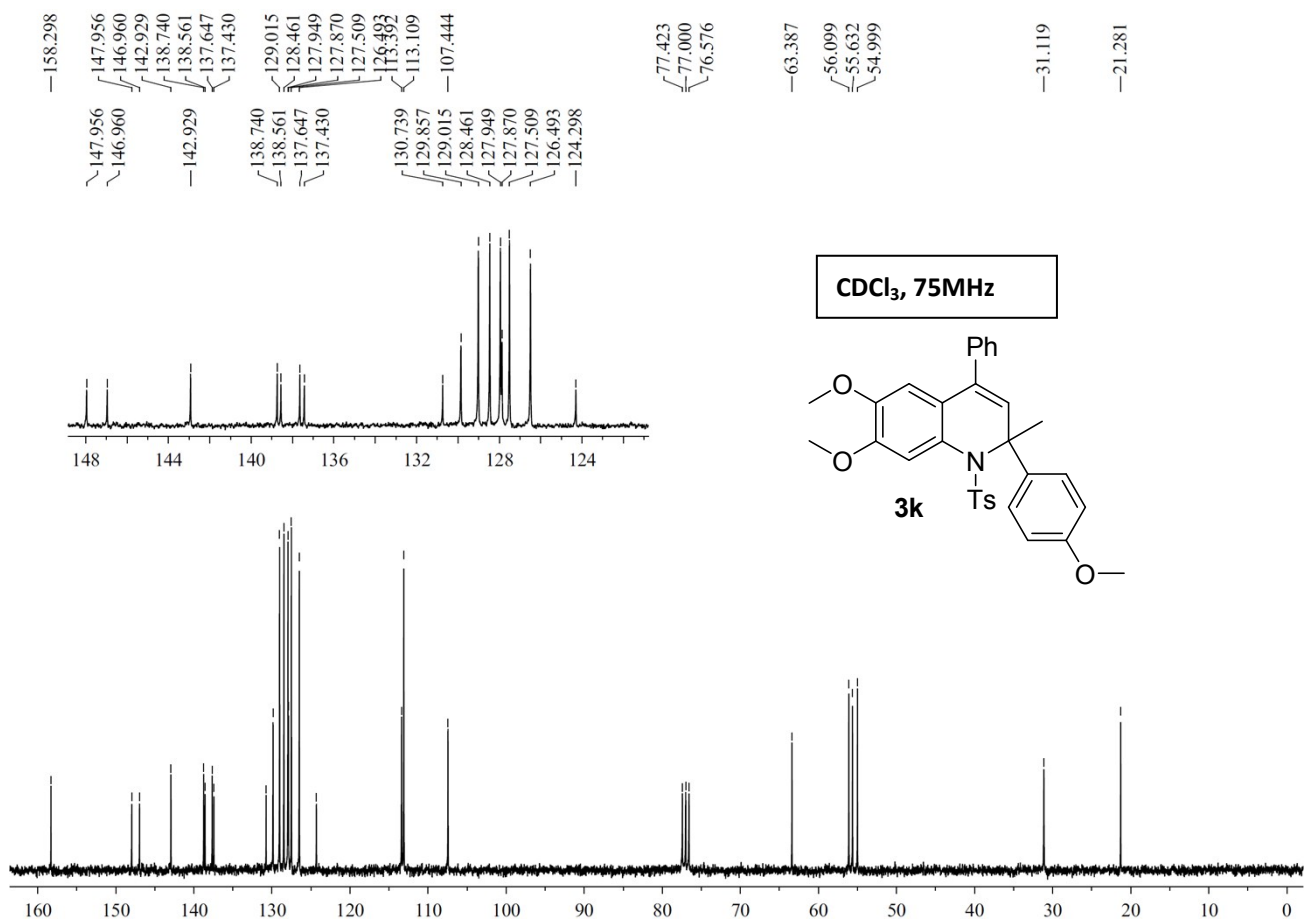

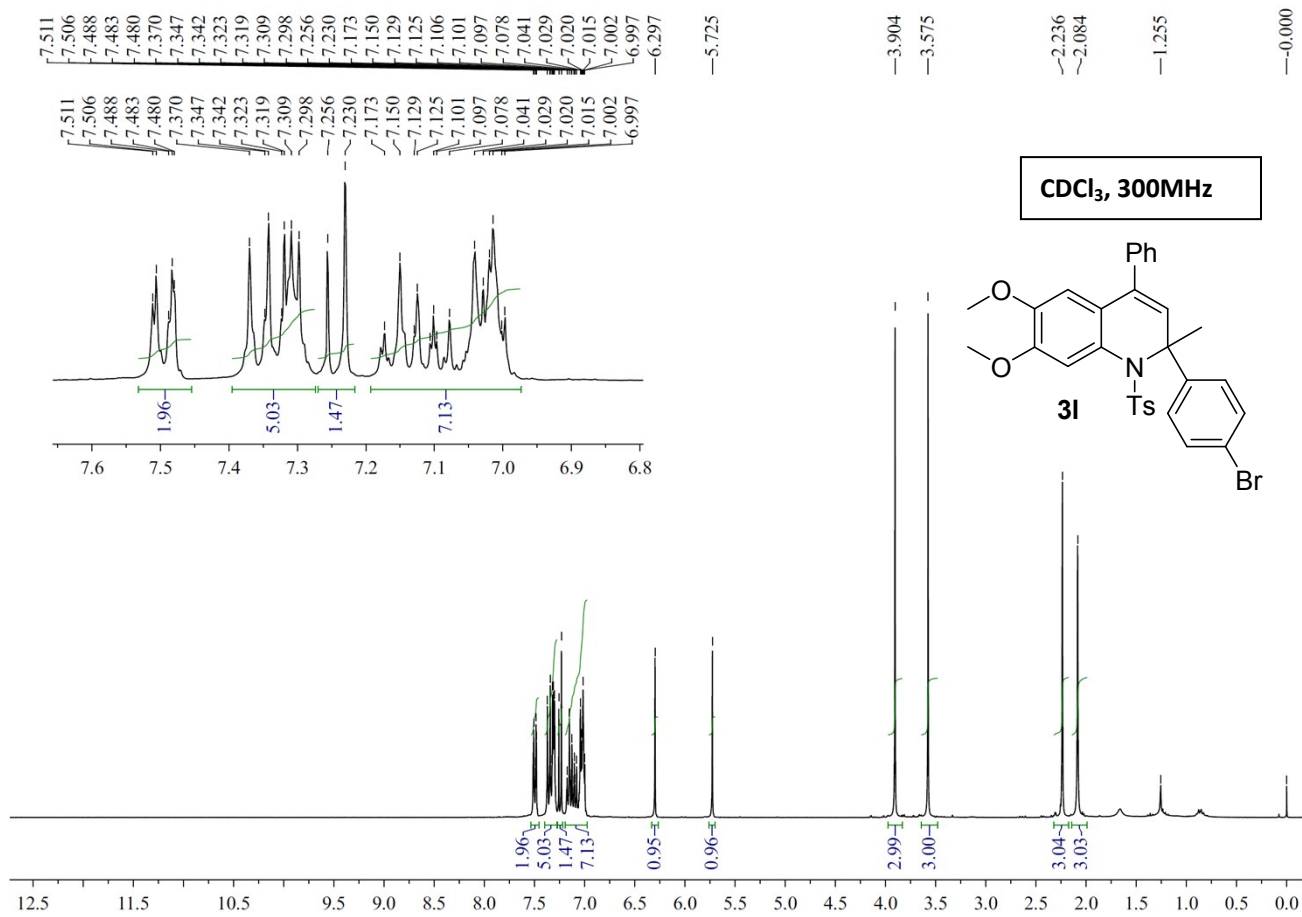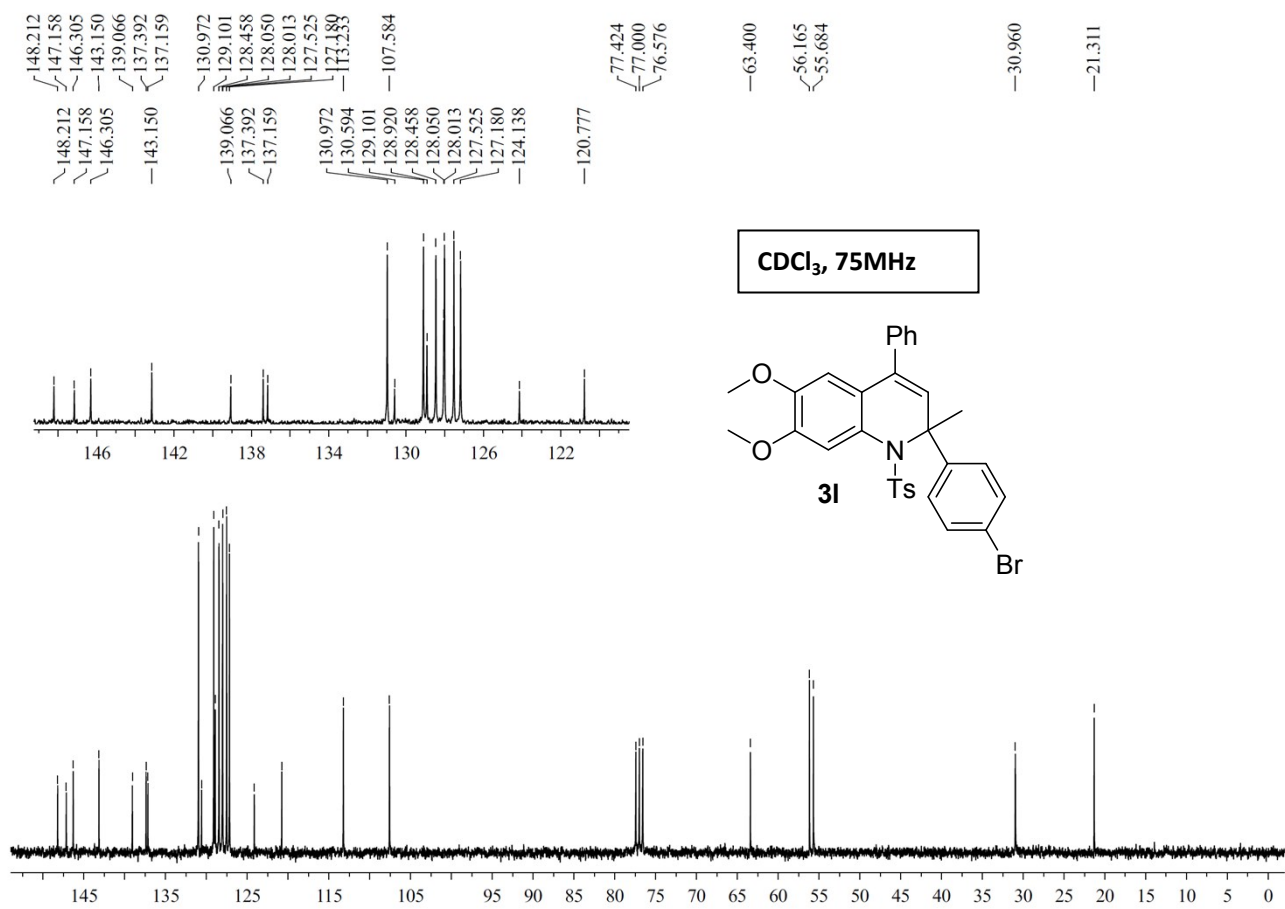

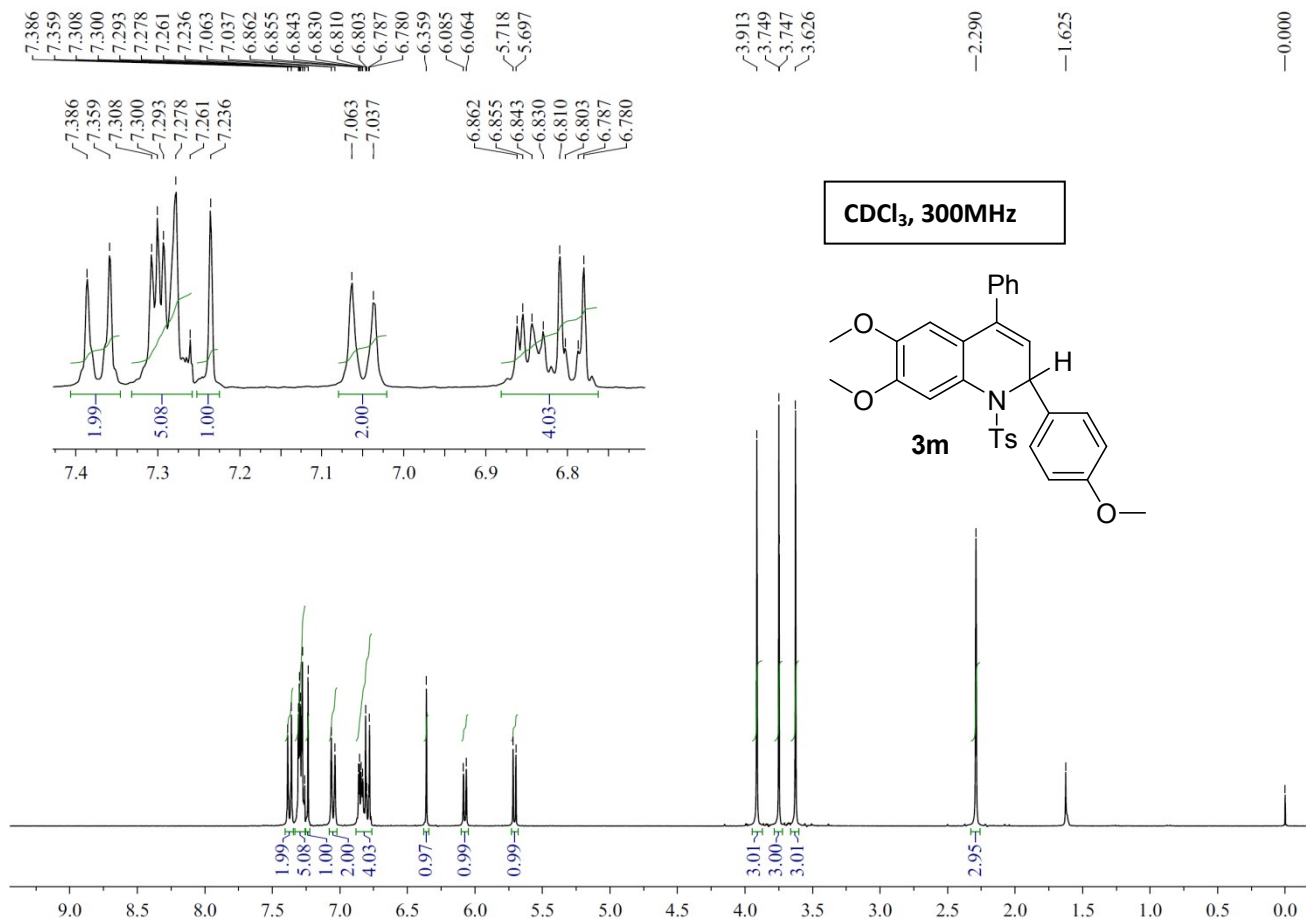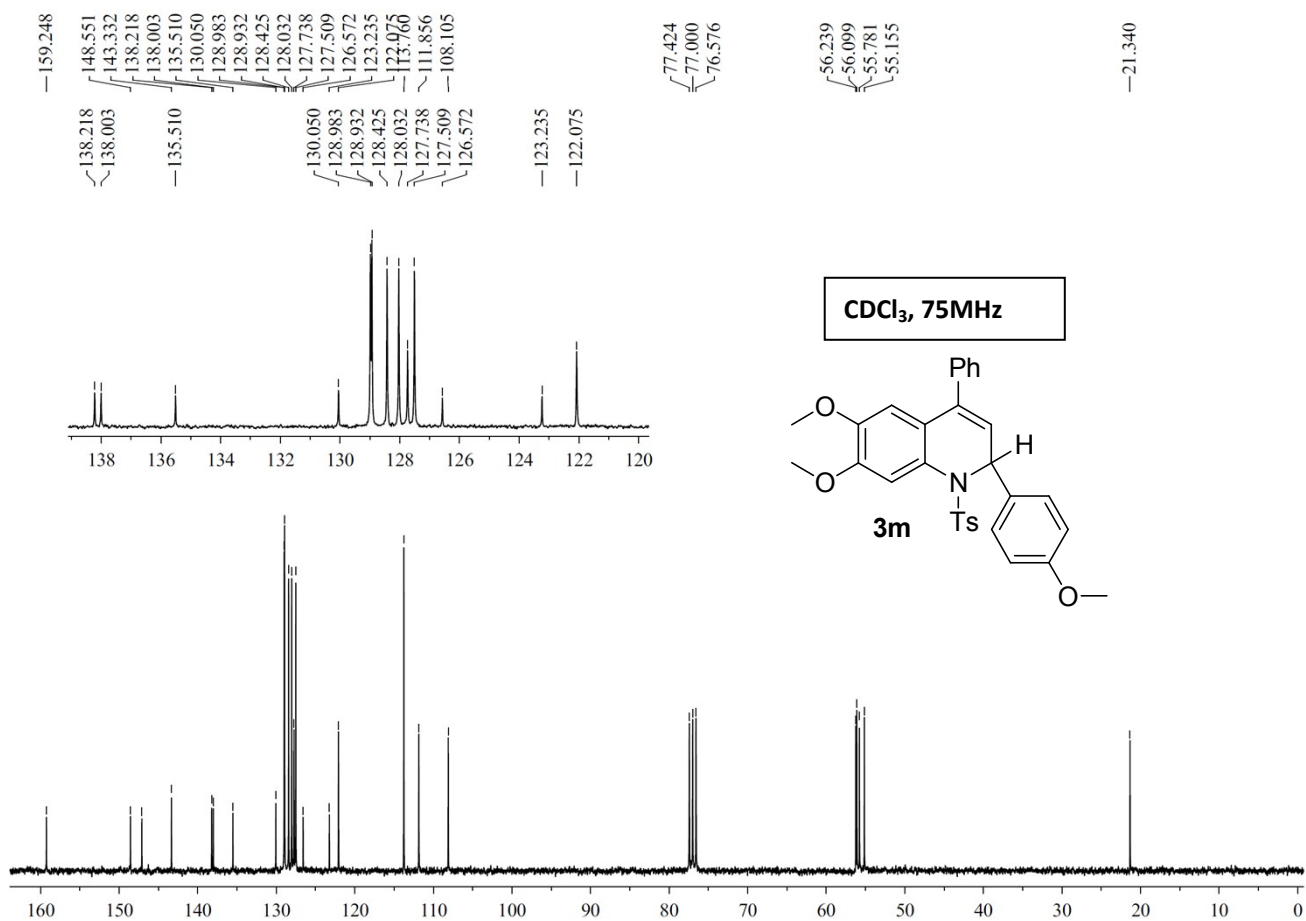



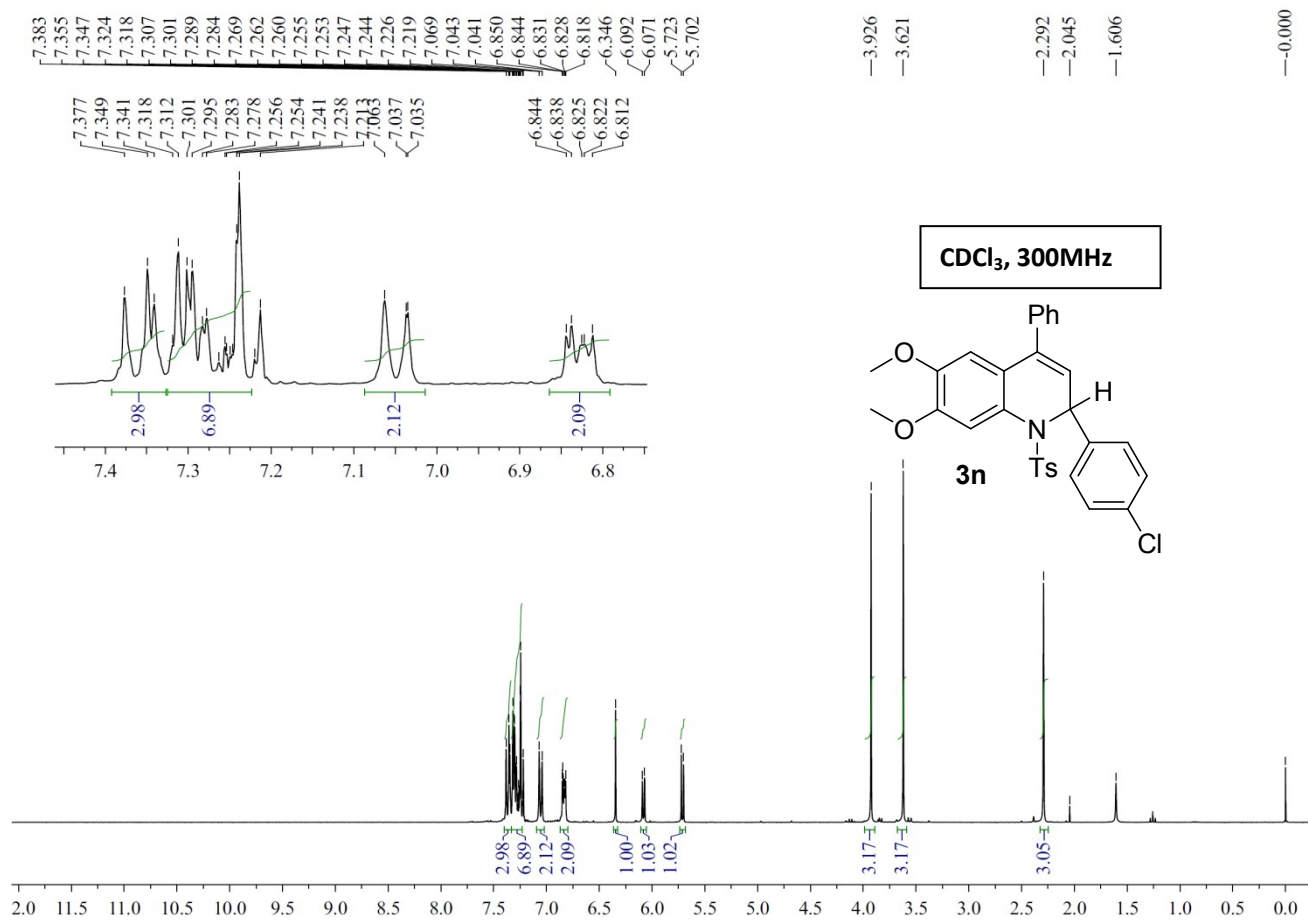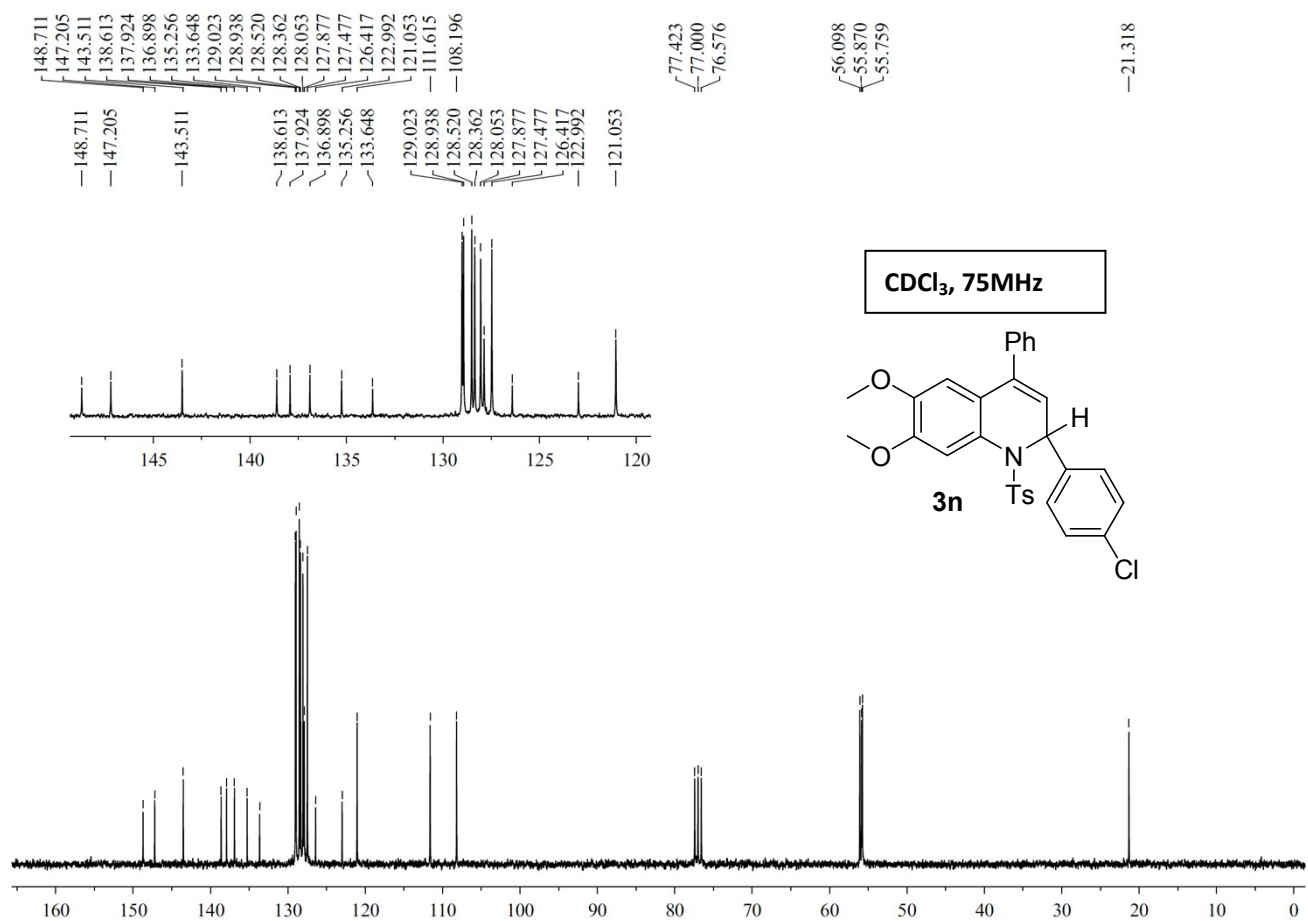



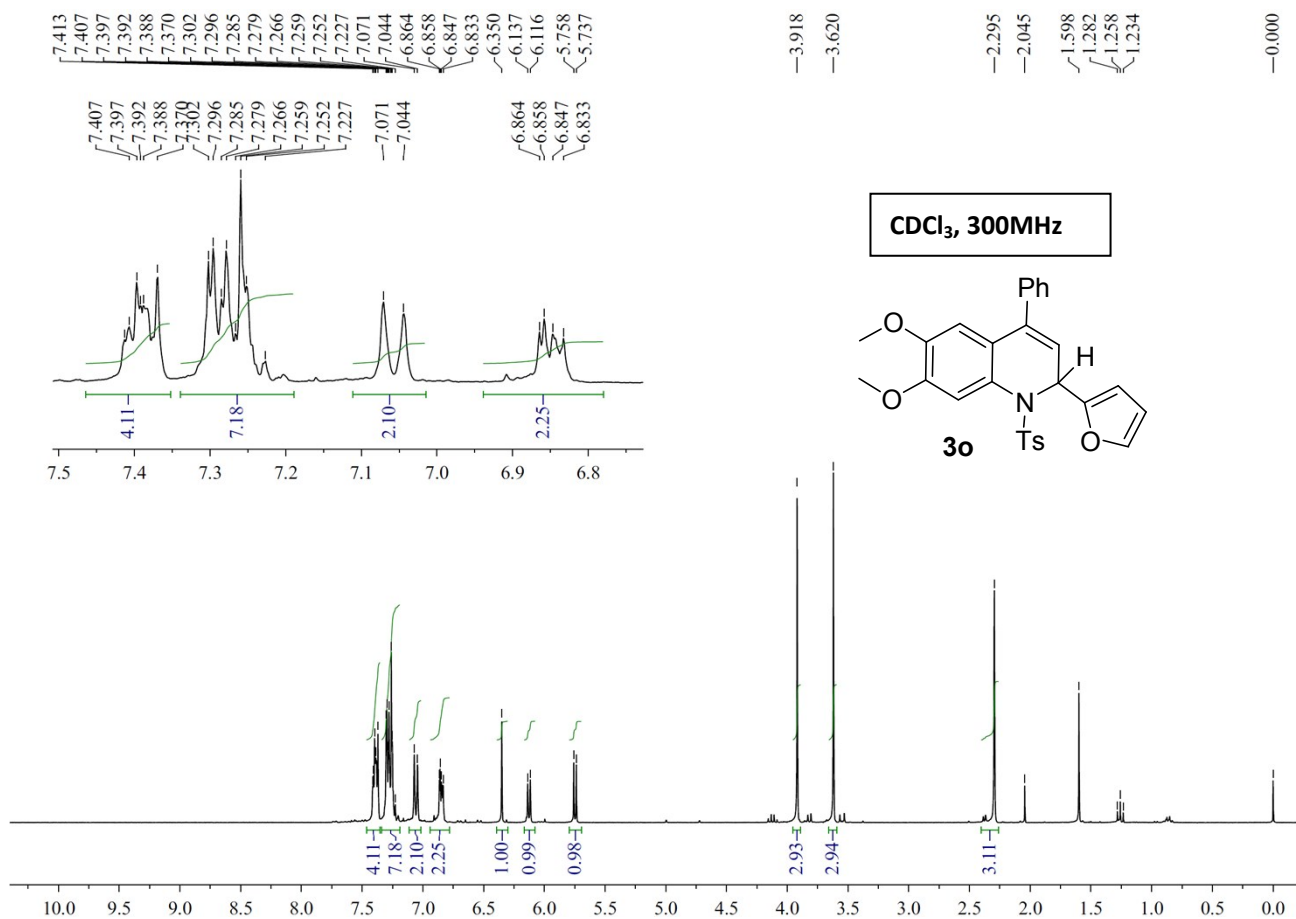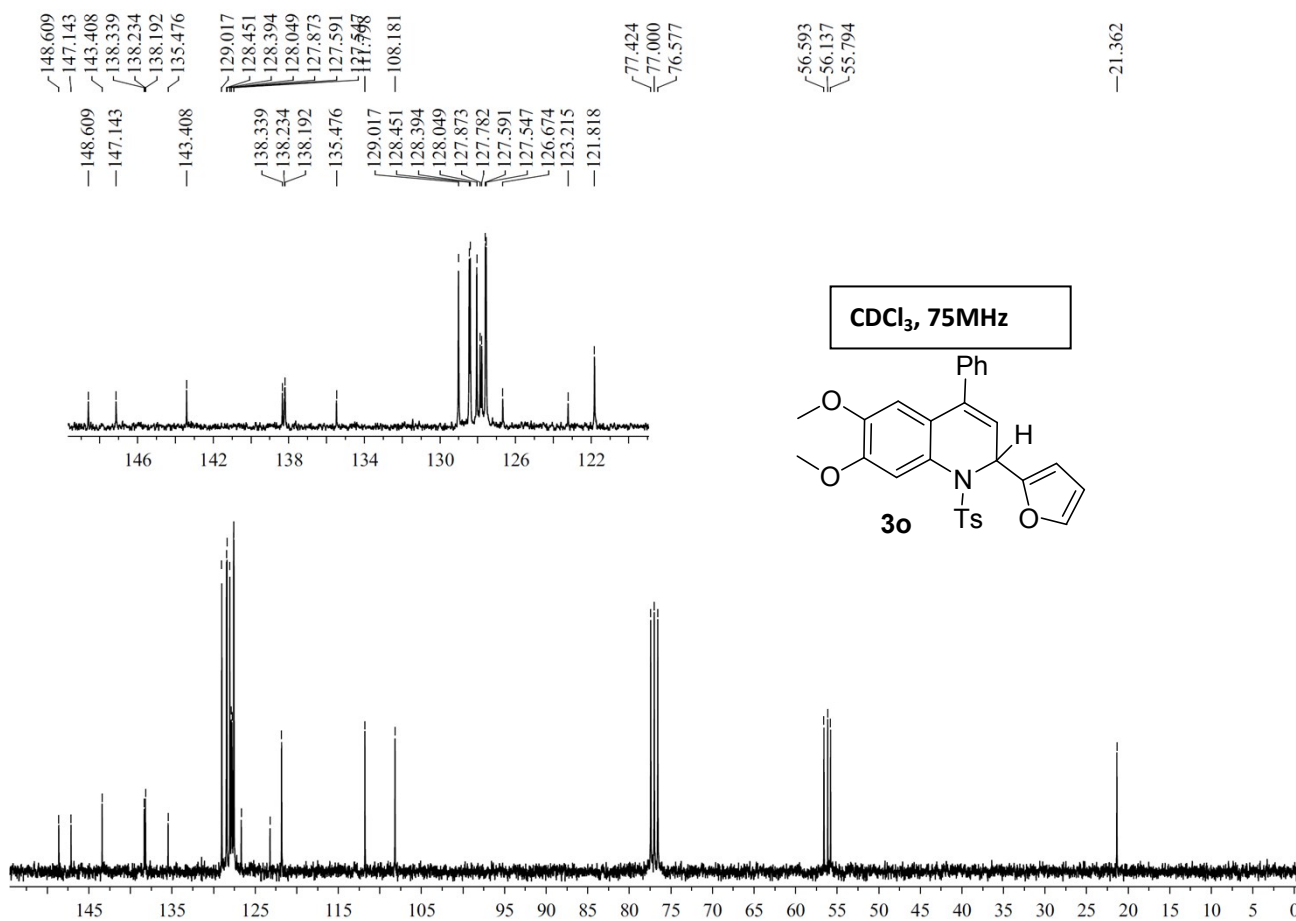

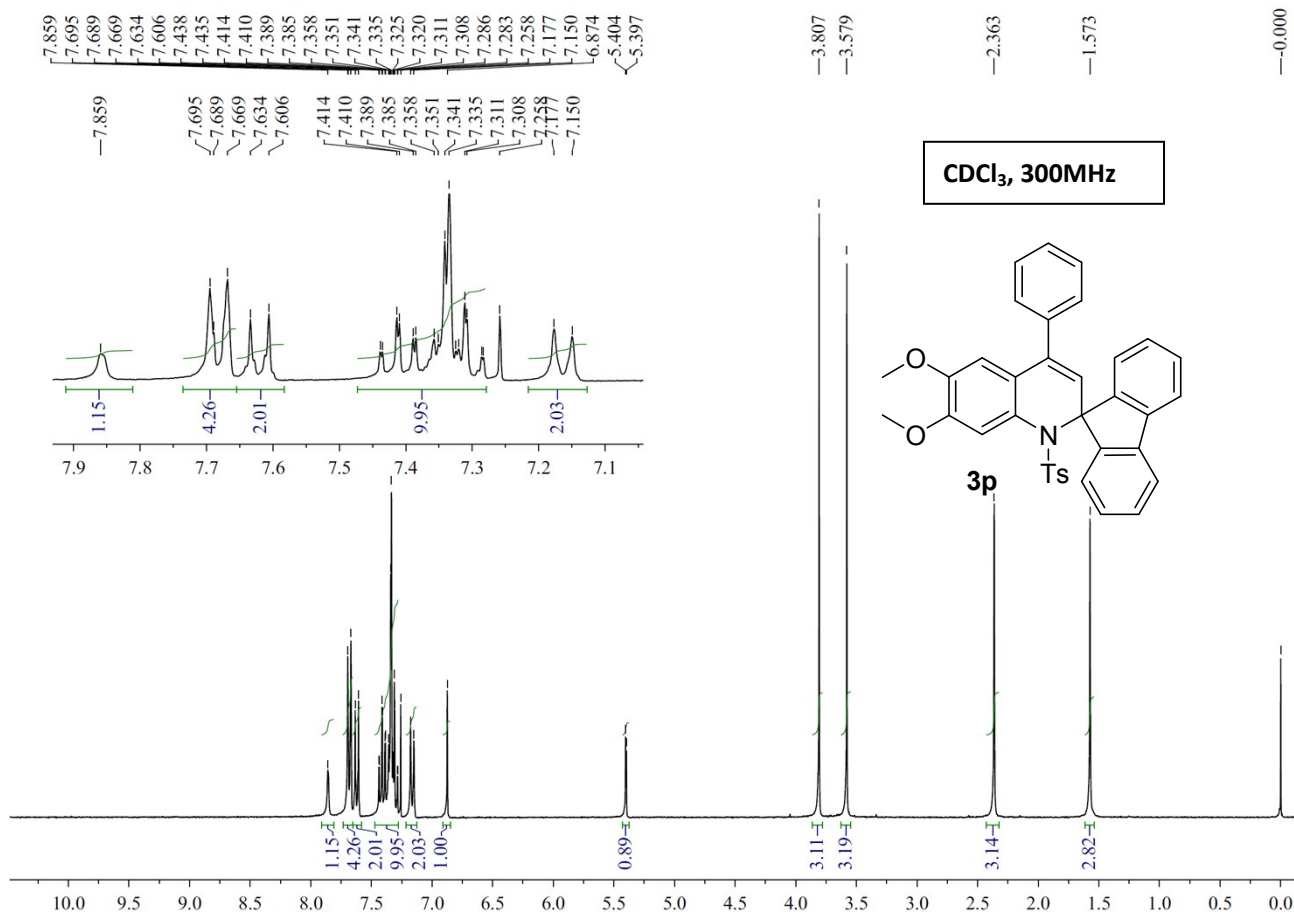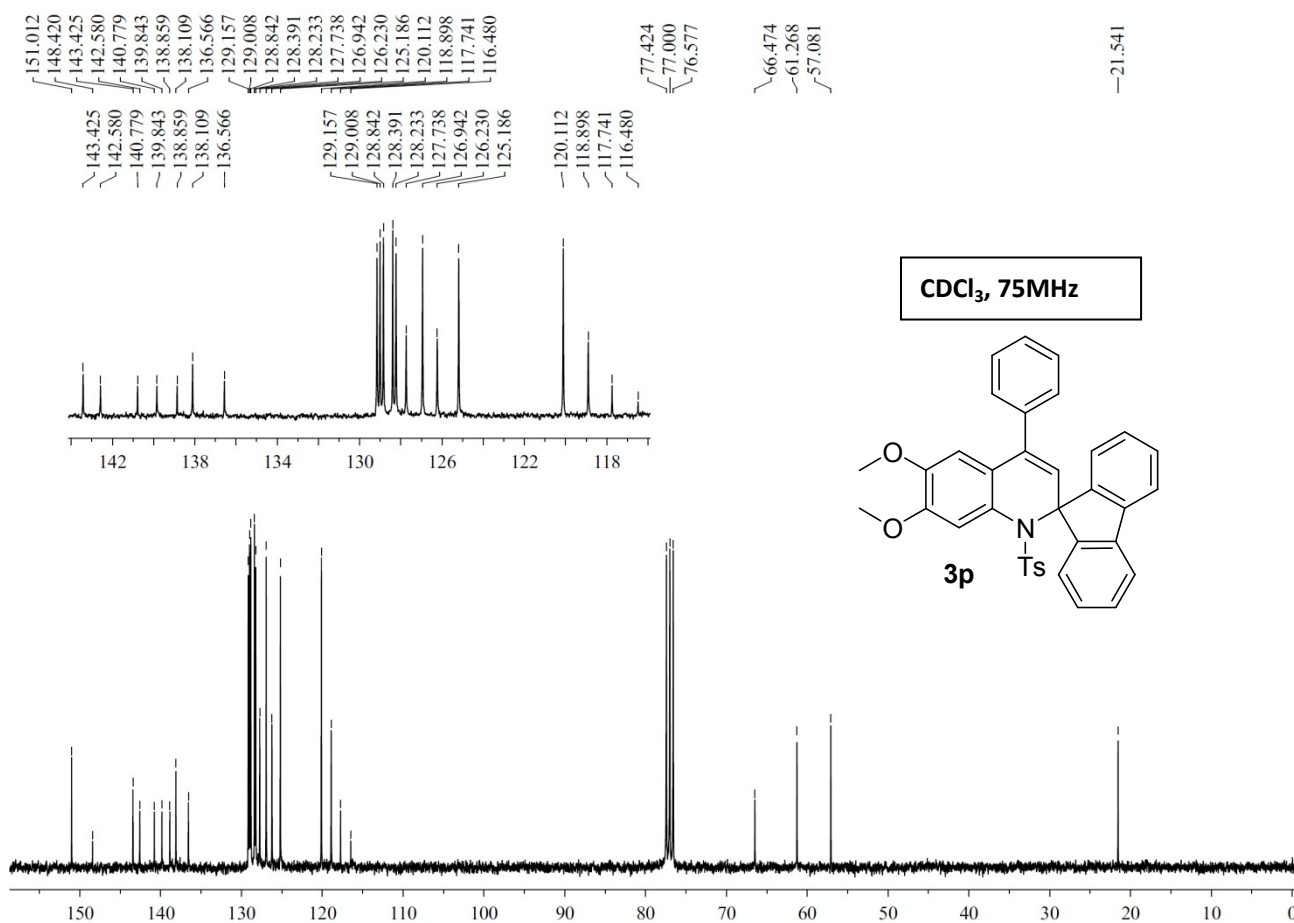

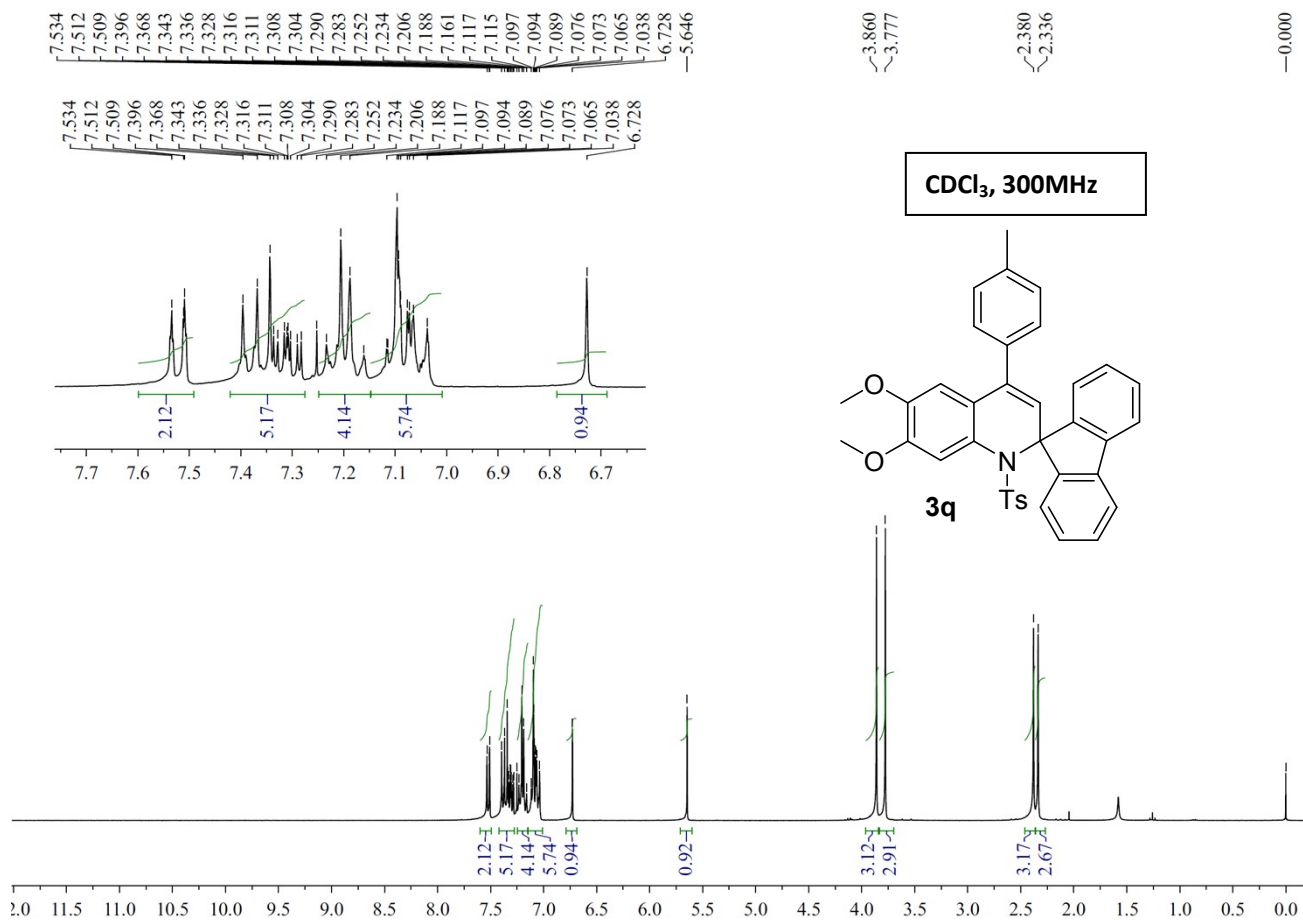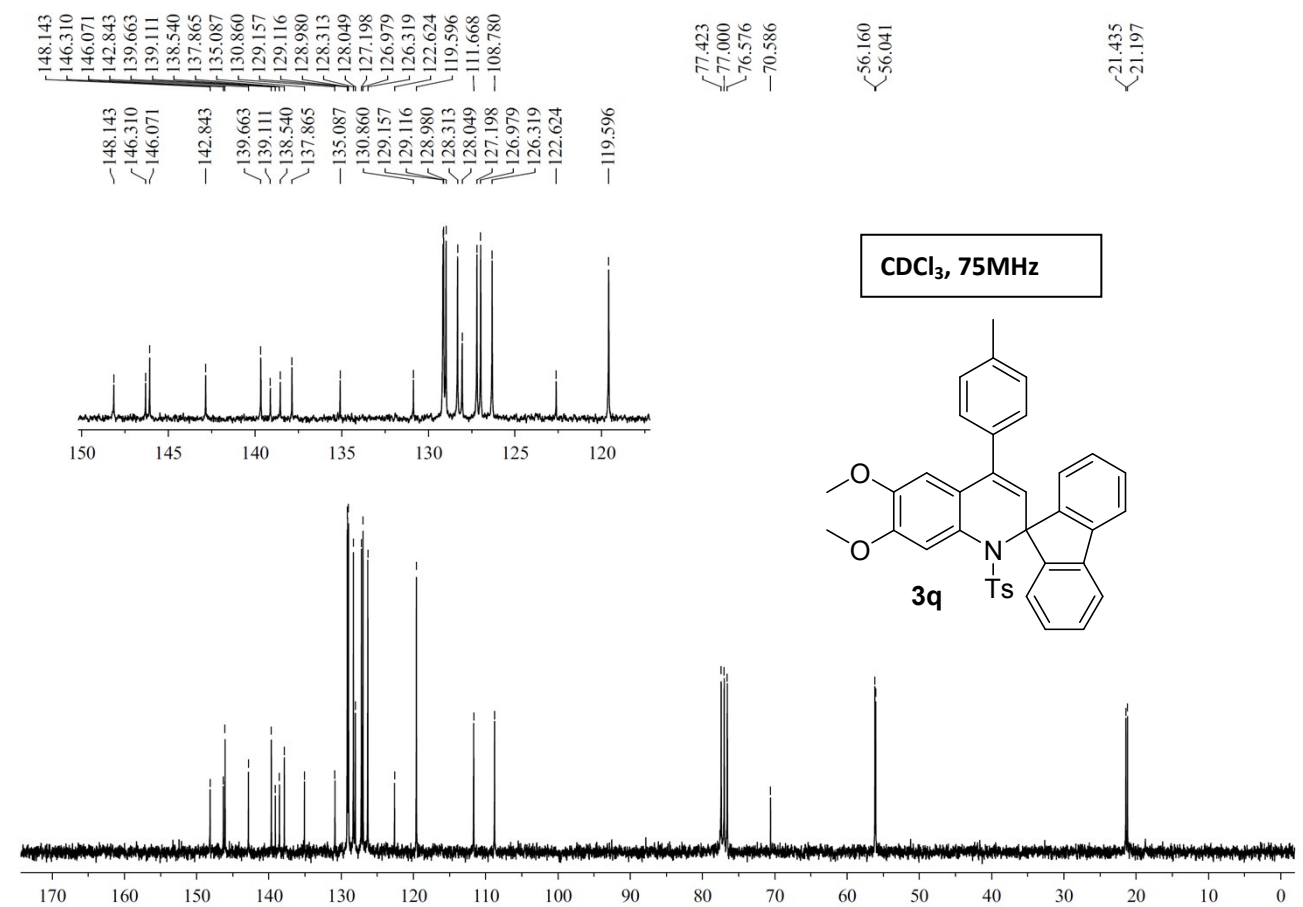

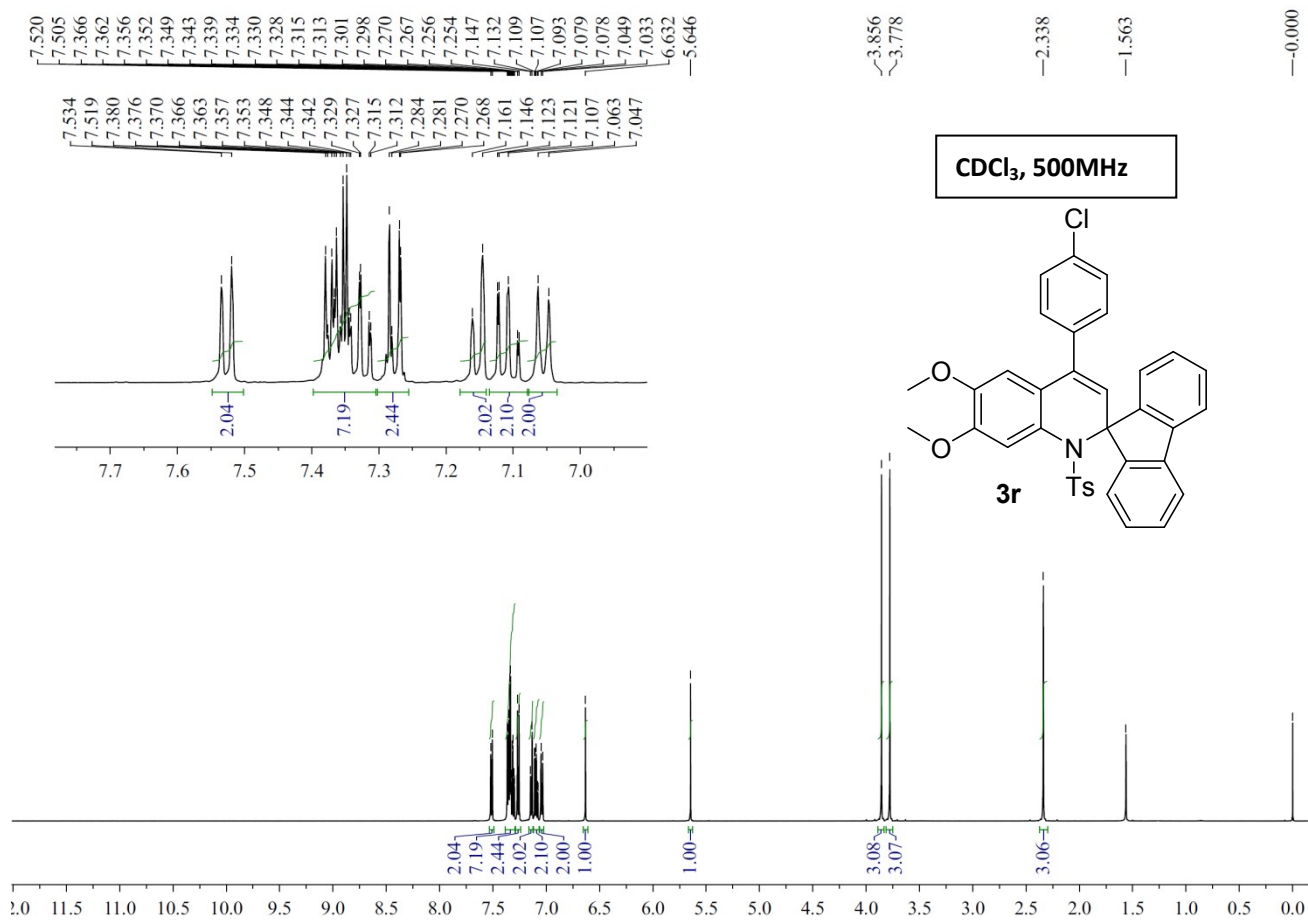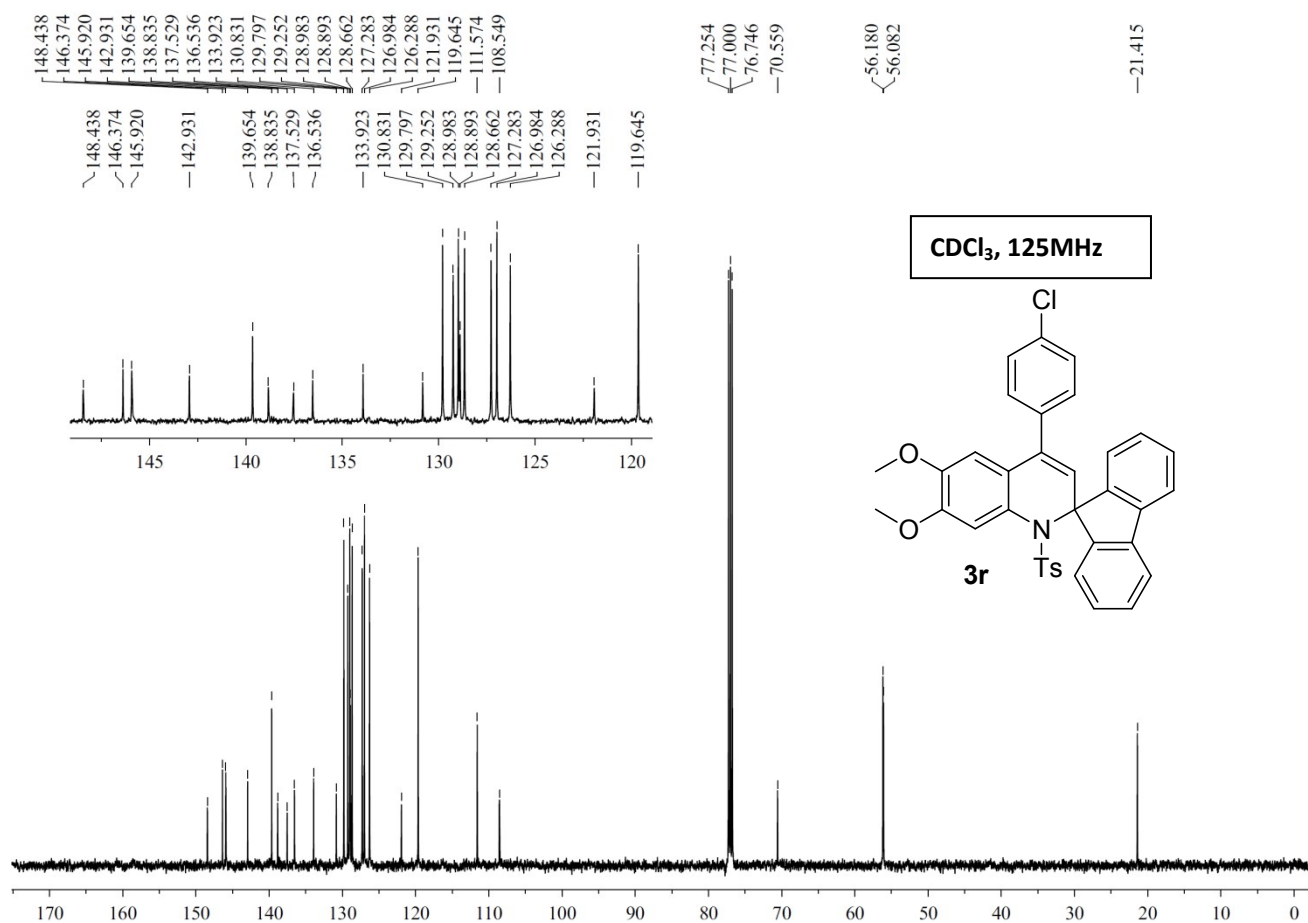

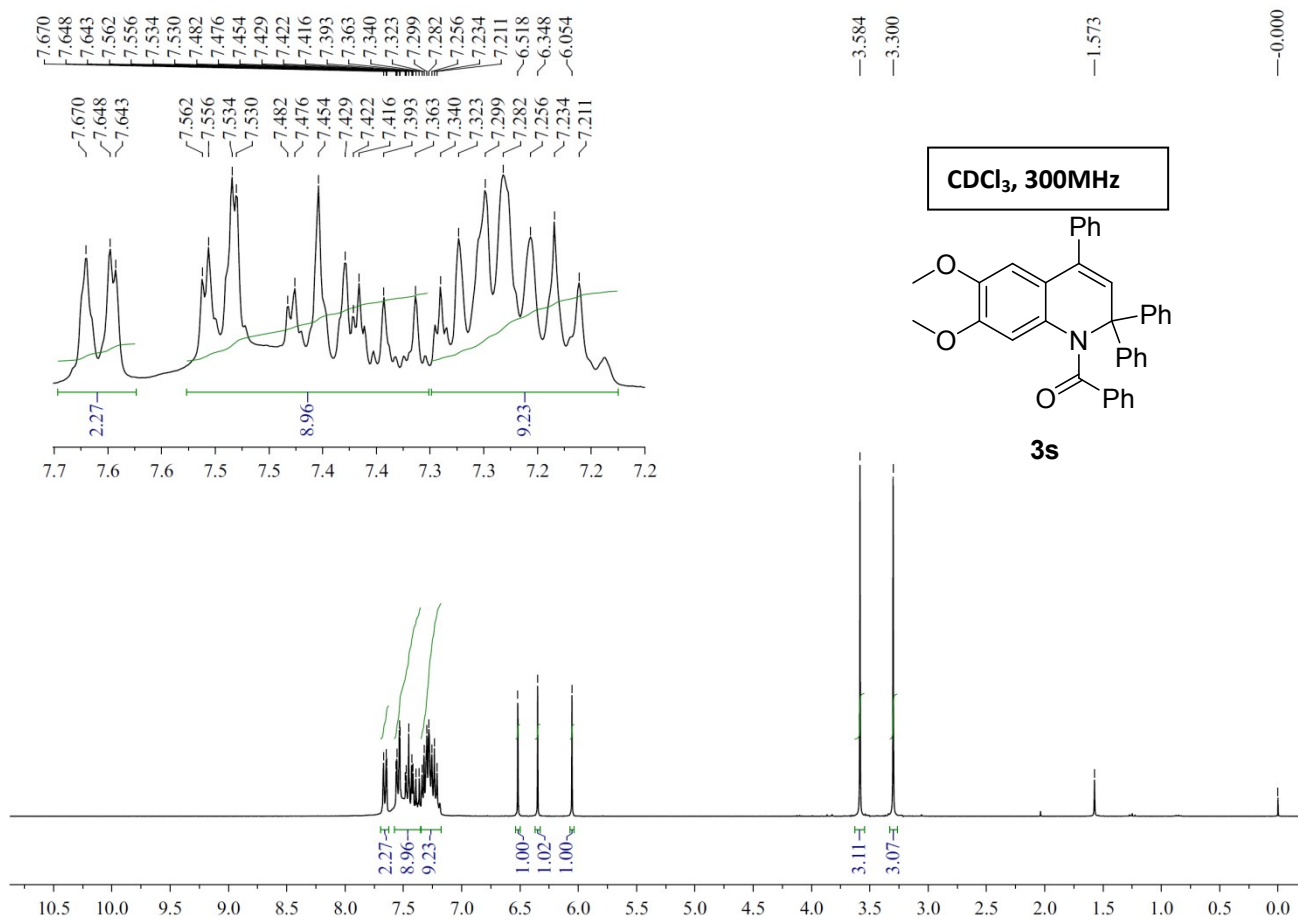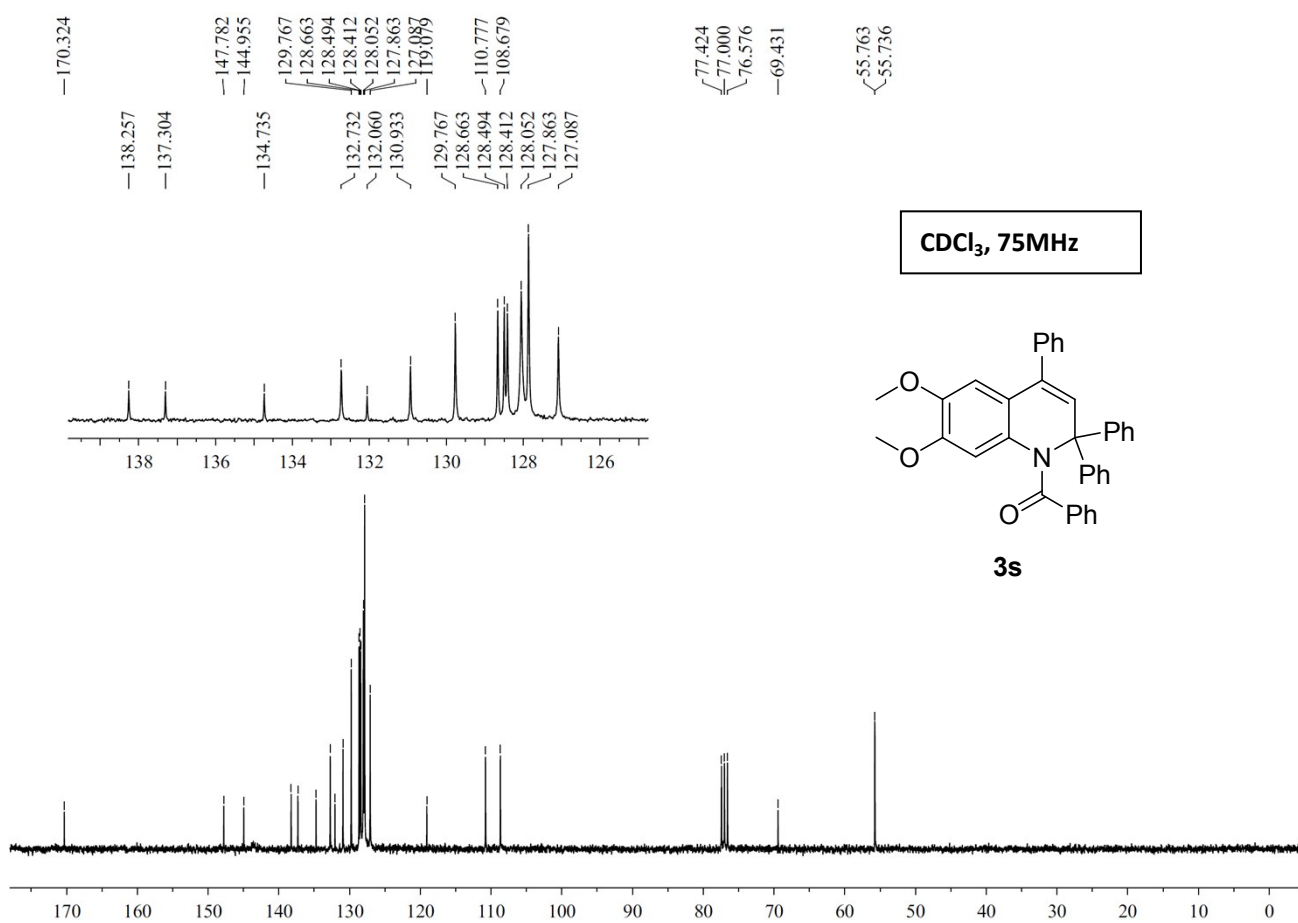

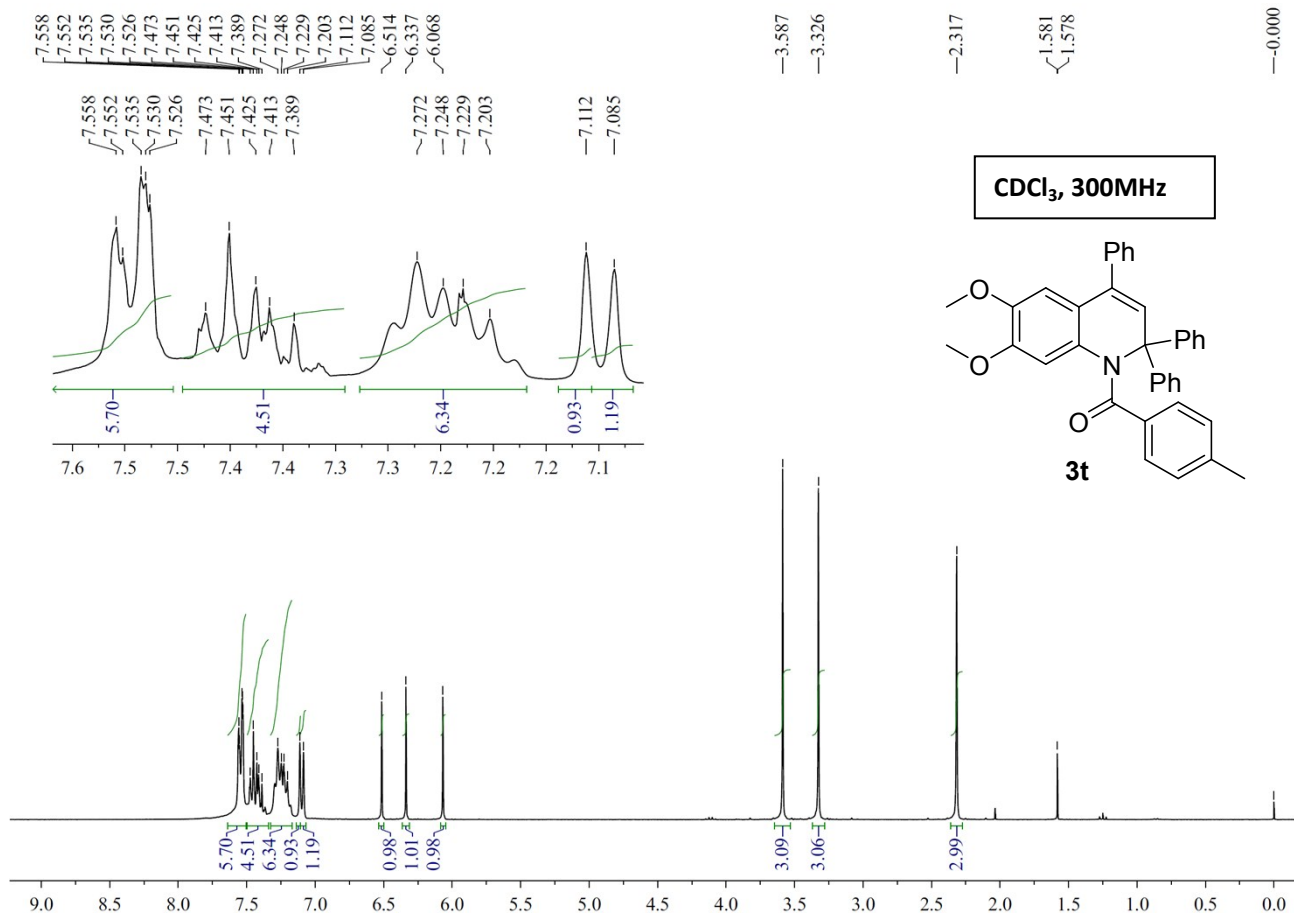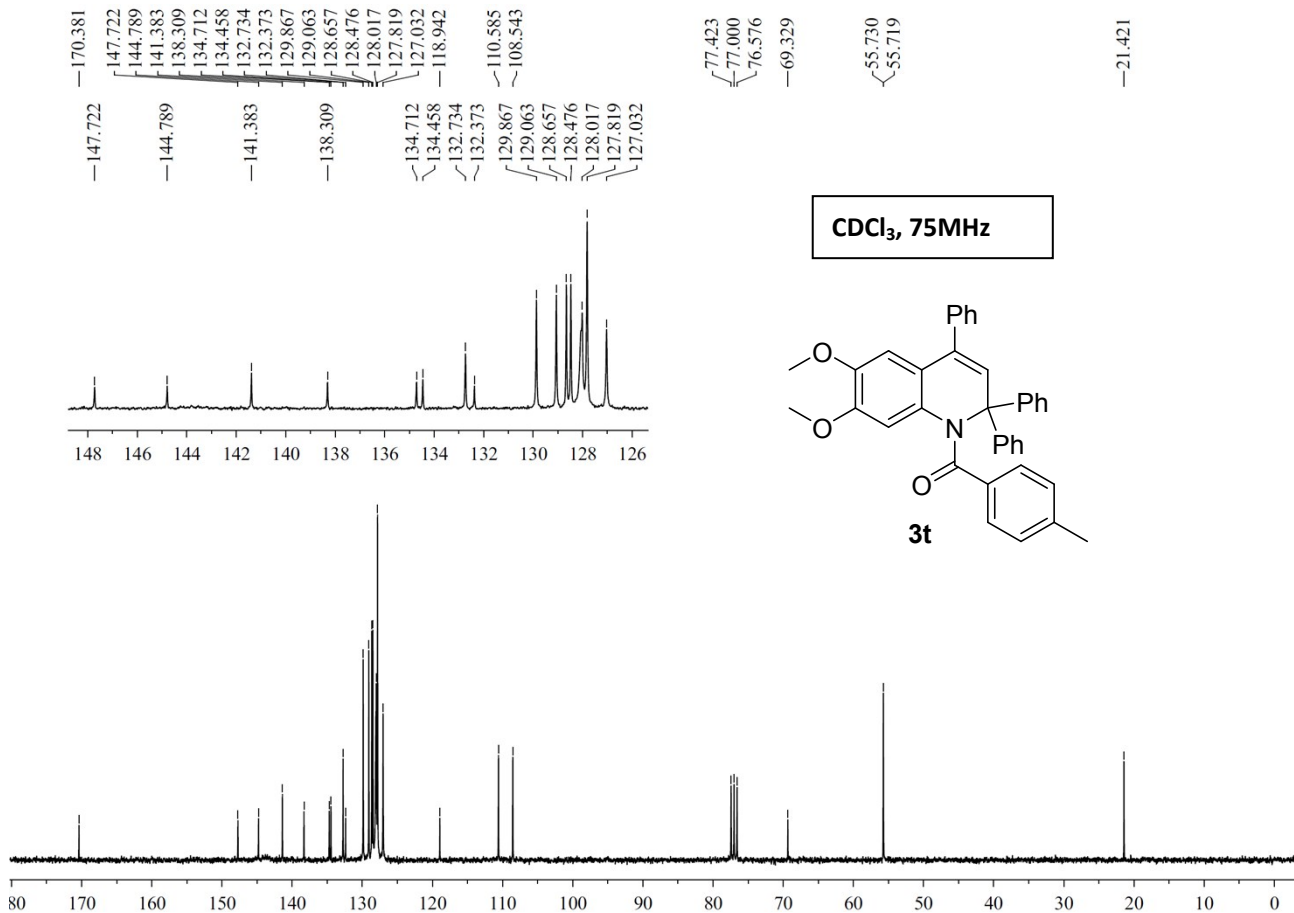



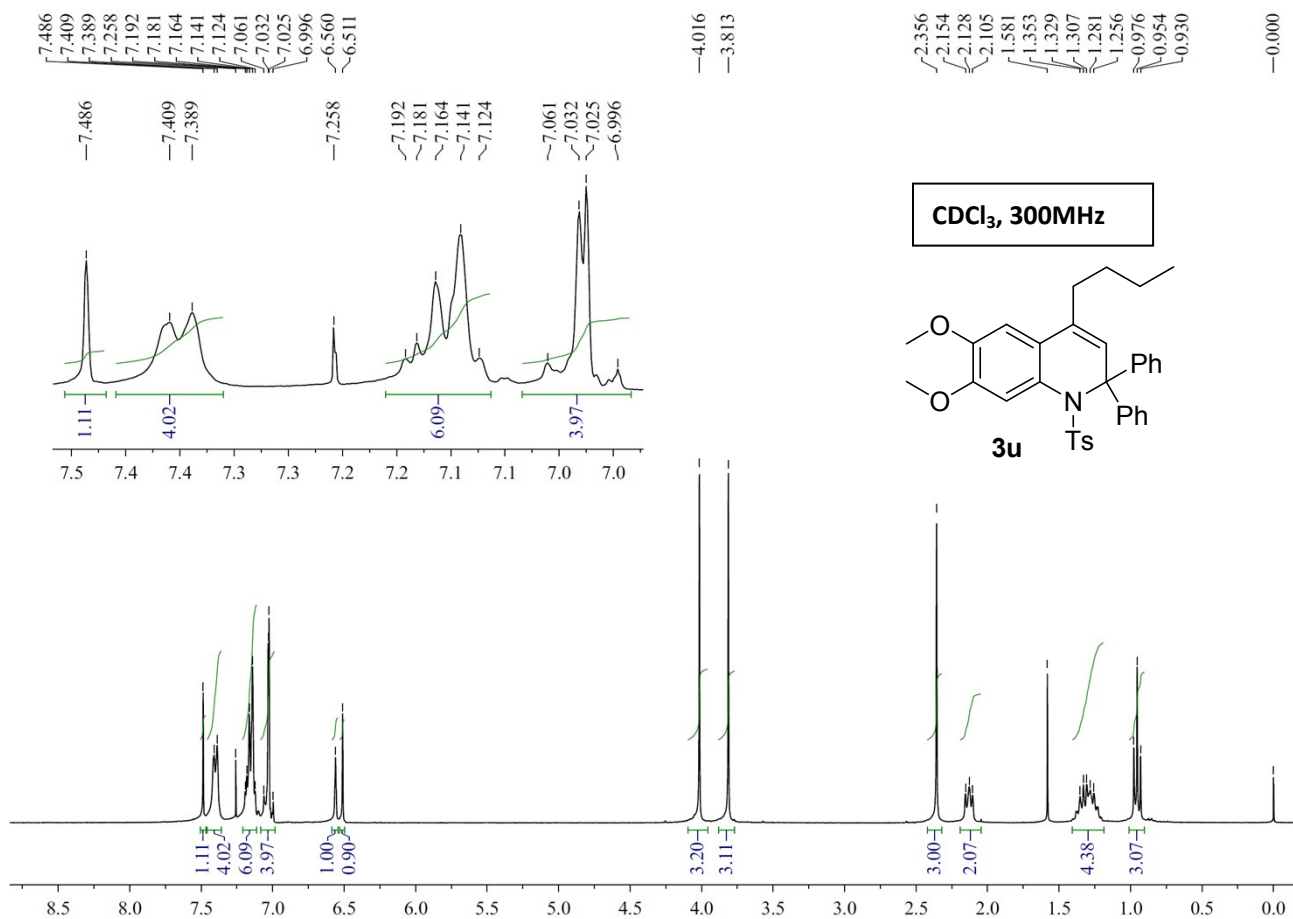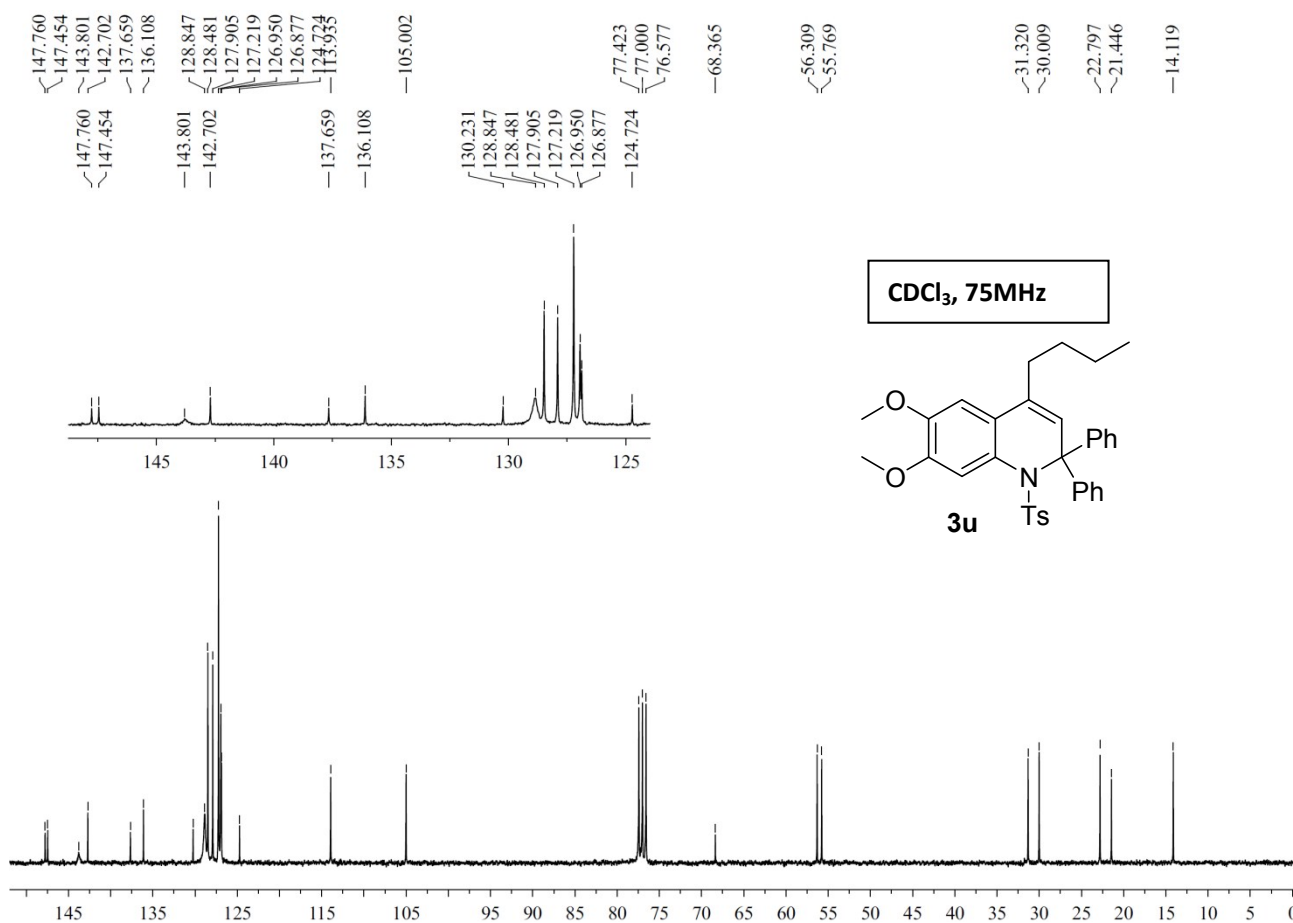



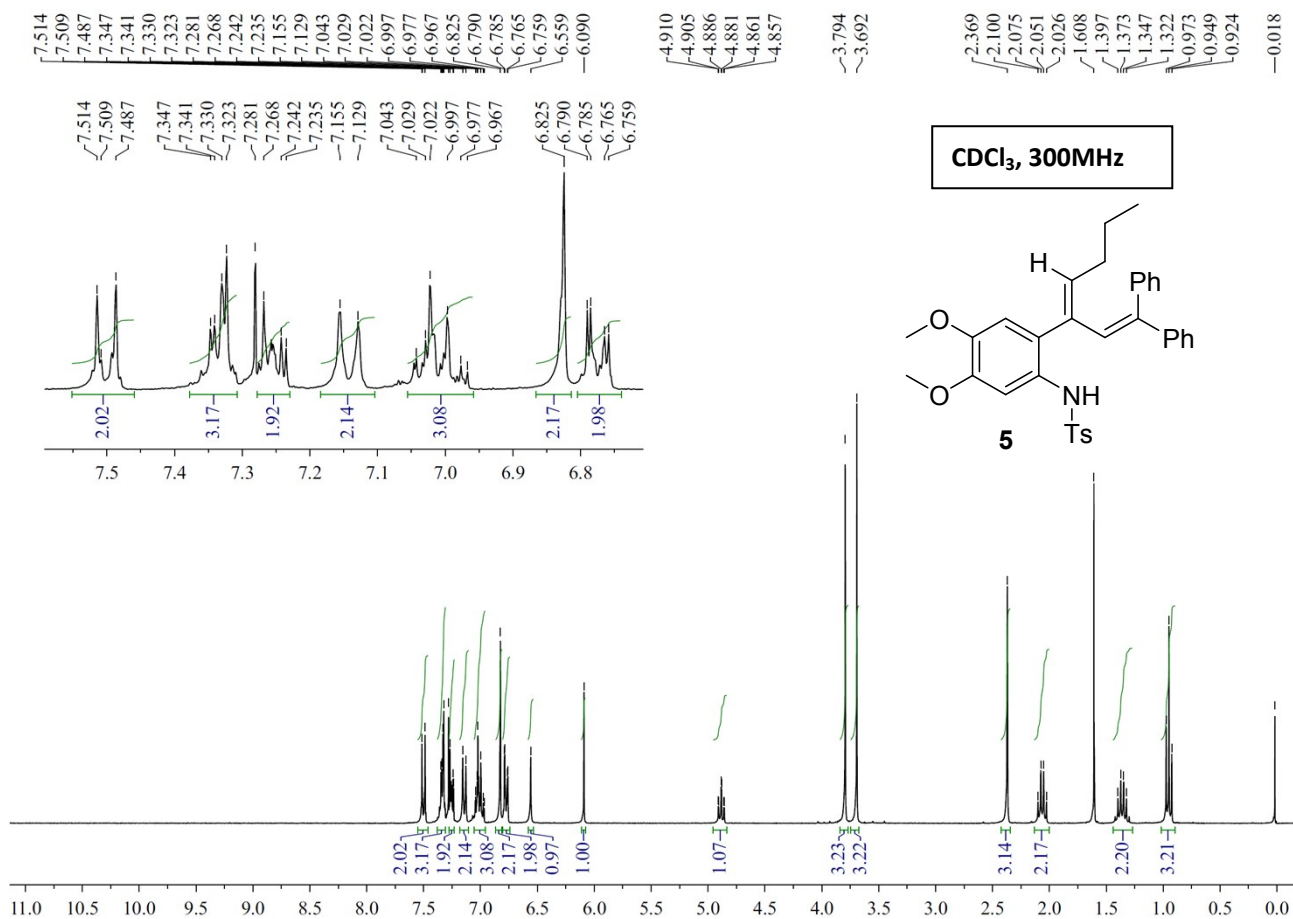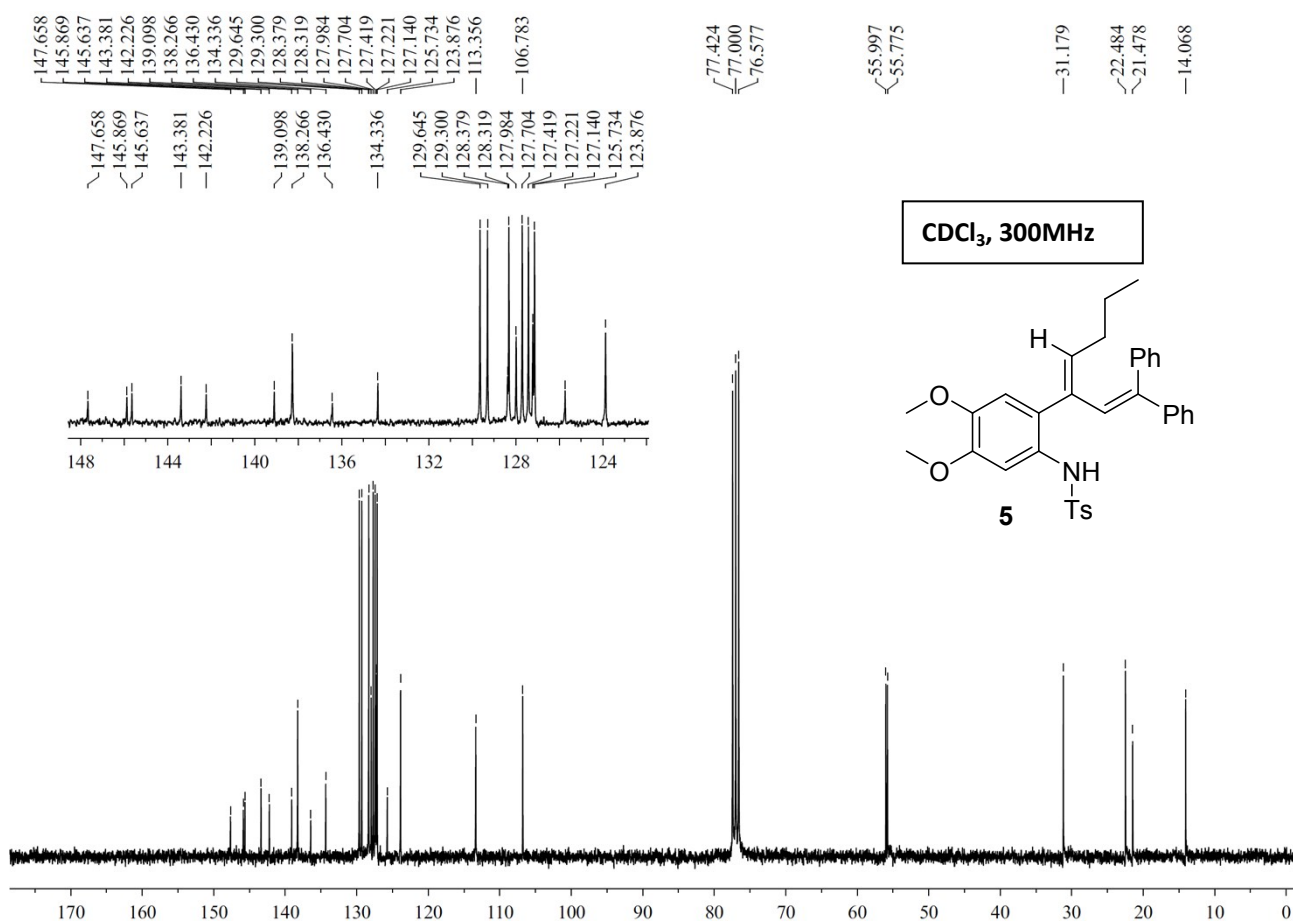

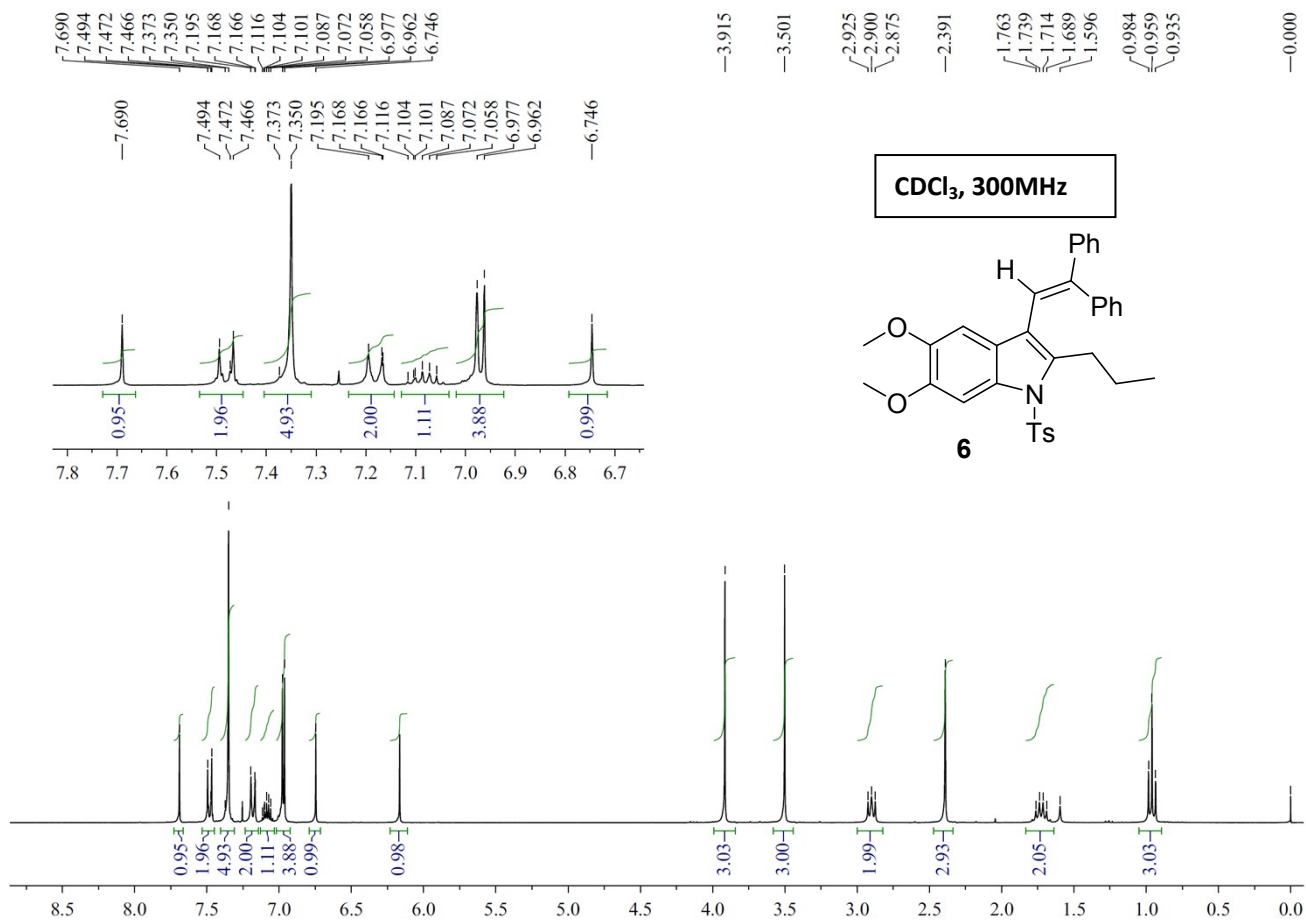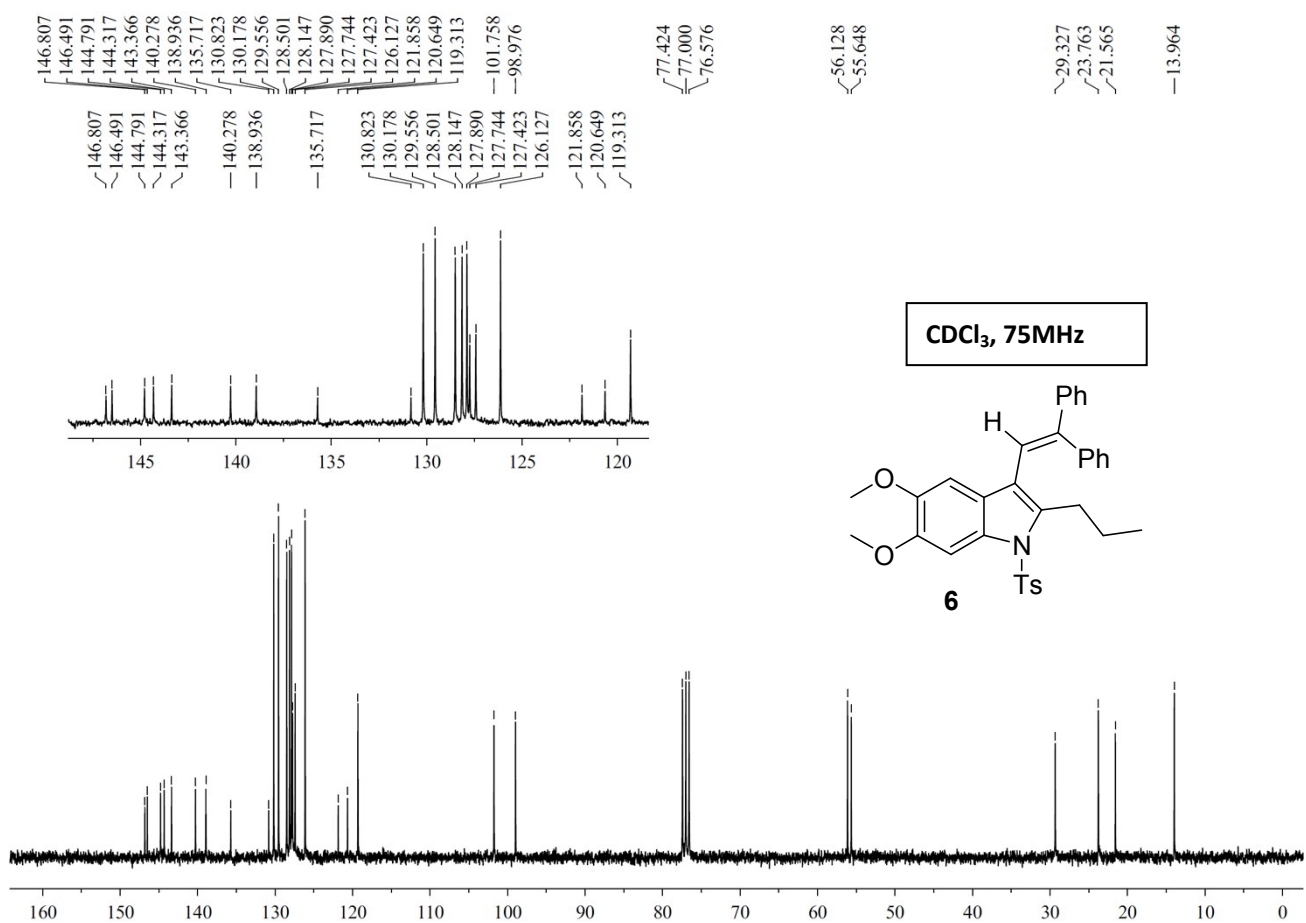

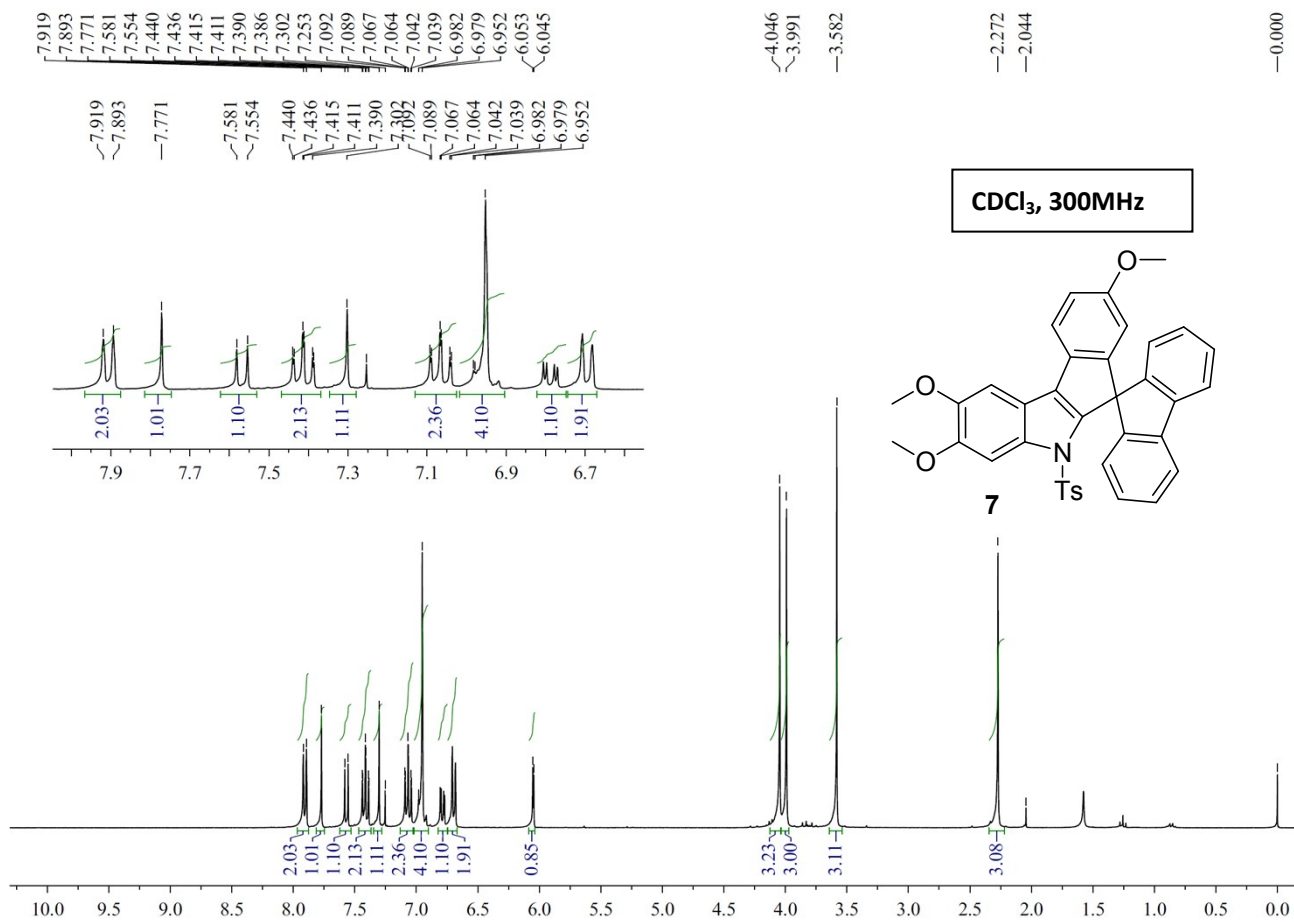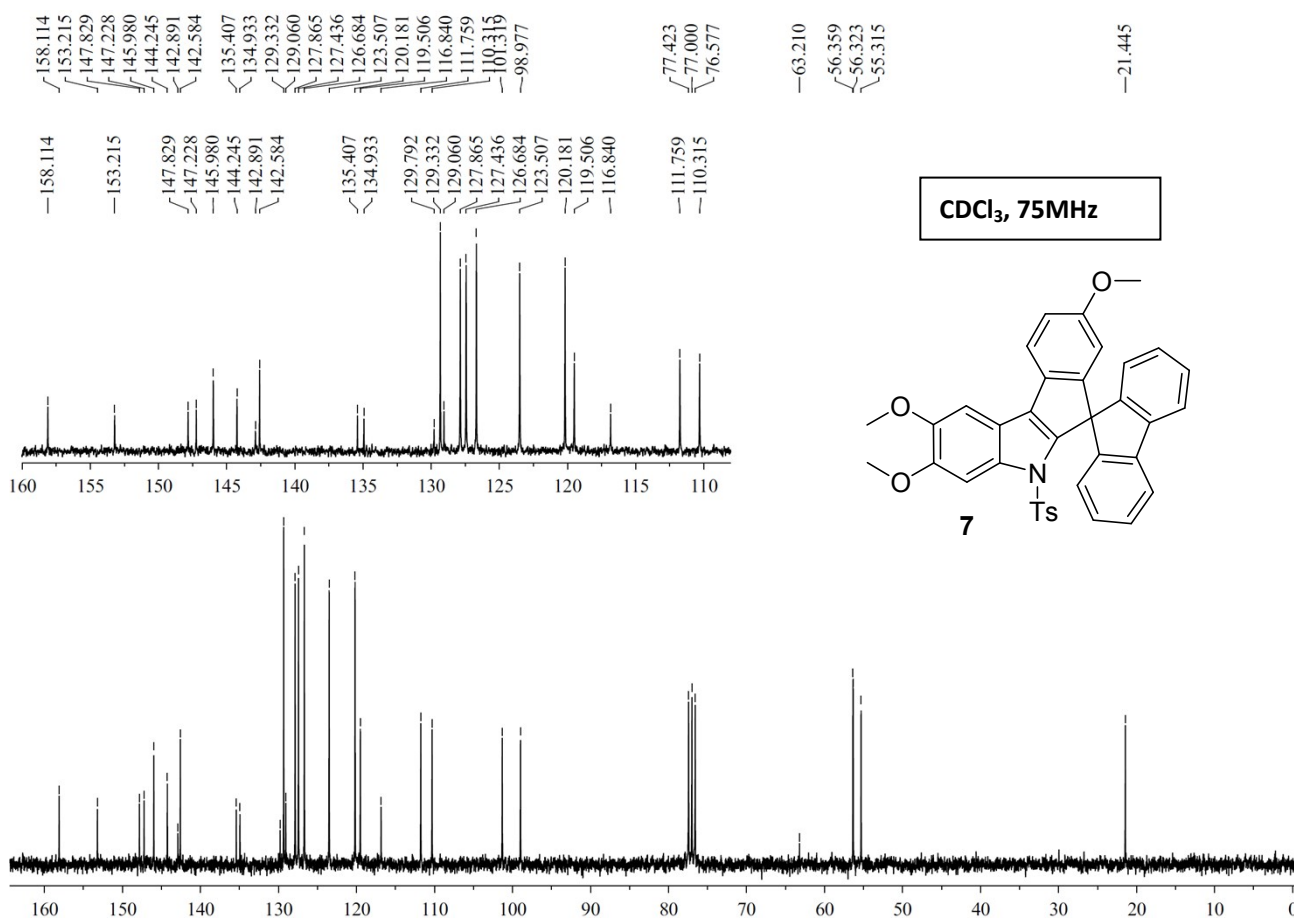

Supplement: c5ob02658j1.pdf [file c5ob02658j1.pdf]
